1 **Title:**

2 **USH2A gene mutations in rabbits lead to progressive retinal degeneration and**

3 **hearing loss**

4 **Authors:**

5 Van Phuc Nguyen<sup>2#</sup>, Jun Song<sup>1#</sup>, Diane Prieskorn<sup>3</sup>, Yanxiu Li<sup>2</sup>, David Dolan<sup>3</sup>, Jie Xu<sup>1</sup>,

6 Jifeng Zhang<sup>1</sup>, K Thiran Jayasundera<sup>2</sup>, Yehoash Raphael<sup>3</sup>, Y. Eugene Chen<sup>1</sup>, Yannis

7 M. Paulus<sup>2\*</sup>, Dongshan Yang<sup>1\*</sup>

8 **Affiliations:**

9 1. Center for Advanced Models for Translational Sciences and Therapeutics,

10 University of Michigan, Ann Arbor, MI 48109, USA

11 2. Kellogg Eye Center, Department of Ophthalmology and Visual Sciences, University

12 of Michigan, Ann Arbor, MI 48105, USA

13 3. Kresge Hearing Research Institute, Department of Otolaryngology-Head and Neck

14 Surgery, University of Michigan, Ann Arbor, MI 48109, USA

15

16 # These authors contributed equally to this work.

17 \*Correspondence should be addressed to D.Y. [doyang@med.umich.edu](mailto:doyang@med.umich.edu) and Y.M.P.

18 [ypaulus@med.umich.edu](mailto:ypaulus@med.umich.edu),

19

20

21

22

23 **Abstract**

24 Mutations in USH2A gene are responsible for the greatest proportion of hearing and  
25 vision loss among individuals with Usher Syndrome (USH) and for autosomal  
26 recessive non-syndromic retinitis pigmentosa. Mutations on USH2A exon 13 account  
27 for more than 35% of the disease causing USH2A variants including the most  
28 prevalence point mutation, c.2299delG, a frameshift mutation. The lack of a clinically  
29 relevant animal model has been a bottleneck for the development of therapeutics for  
30 USH2A related vision loss. Using CRSPR/Cas9 technology, this study establishes a  
31 rabbit line carrying an USH2A frameshift mutation on exon12 (equivalent to human  
32 USH2A Exon 13) as a novel mammalian animal model of USH2A. The bi-allelic  
33 mutant rabbits exhibit hyper reflective signals in FAF indicating RPE damage and  
34 OCT changes indicating photoreceptor degeneration as early as 4 months of age.  
35 ERG signals of both rod and cone function were reduced in the USH2A mutant rabbits  
36 starting from 7 months old and further decreased at 15-22 months old, indicating  
37 progressive retinal photoreceptor degeneration, which is further confirmed by retinal  
38 histopathology examination. ABR examination showed moderate to server hearing  
39 loss in the USH2A mutant rabbits. These results indicated that disruption of USH2A  
40 gene in rabbits is sufficient to induce hearing loss and progressive photoreceptor  
41 degeneration. To our knowledge, this is the first mammalian animal model of USH2  
42 which closely recapitulates the phenotype of retinitis pigmentosa in human patients.  
43 This study supports the use of rabbits as a clinically relevant animal model to  
44 understand the pathogenesis and to develop novel therapeutics for Usher Syndrome.

## 45 **Introduction**

46 Usher syndrome (USH) is an autosomal recessive genetic disorder resulting in  
47 hearing loss, progressive visual impairment and, in some types, balance issues<sup>1</sup>. The  
48 major ocular symptom of patients with USH is a disease called retinitis pigmentosa  
49 (RP). RP causes the light-sensing photoreceptor cells in the retina to gradually  
50 deteriorate, initially resulting in night blindness, followed by tunnel vision, and severe,  
51 permanent, progressive vision loss. More than 400,000 people are affected by USH  
52 worldwide, accounting for about 50 percent of all hereditary deaf-blindness cases<sup>2</sup>.  
53 USH is classified into three subtypes (I, II, and III), which are distinguished by severity  
54 and age of onset of deafness, presence or absence of vestibular dysfunction, and age  
55 at onset of RP. Among them, type II (USH2) is the most common subtype,  
56 characterized by hearing loss from birth and progressive vision loss that begins in  
57 adolescence or adulthood. USH2 may be caused by mutations in any of three genes:  
58 USH2A, GPR98, and DFNB31, with USH2A mutations being the most prevalent,  
59 present in approximately 70% of USH2 cases<sup>3</sup>. Mutations in the USH2A gene are  
60 also a cause of some forms of RP without hearing loss (i.e., non-syndromic RP)<sup>4</sup>.  
61 More than 700 pathogenic USH2A mutations have been identified, as reported in the  
62 LOVD database (<http://www.lovd.nl>). Mutations in exon 13 account for approximately  
63 35% of all USH2A cases, including the two most recurrent mutations in USH2A,  
64 c.2299delG (p. Glu767fs\*21) and c.2276G>T (p. Cys759Phe)<sup>5</sup>. Despite extensive  
65 research, there is no cure for USH2 yet. Hearing aids provide benefits to USH2  
66 patients who have moderate to severe hearing loss; however, efforts to mitigate the

67 progressive visual loss caused by RP have been disappointing. Most individuals with  
68 USH2 RP will eventually suffer from severe, progressive vision loss. Therefore, there  
69 is a pressing unmet clinical need to develop novel therapeutics for USH2.

70

71 Mouse and zebrafish models of USH2A have been developed. Unfortunately,  
72 phenotypes observed in retinas of USH2A-USH2 patients are not faithfully replicated  
73 in mouse models carrying USH2A mutations<sup>6-8</sup>. USH2A knock out mice suffer from  
74 hearing loss but only manifested weak and very late onset retina degeneration  
75 phenotype. The zebrafish models exhibit early retinal degeneration phenotypes.

76 However, their features of adult photoreceptor regeneration as well as the distance  
77 from humans may pose problems in translational studies<sup>9</sup>. Therefore, development of  
78 an alternative mammalian model of USH2, which more closely approximates human  
79 physiology, function, and anatomy, and importantly RP pathogenesis is of prime  
80 importance and may accelerate translating discoveries from animal models into  
81 clinical therapies and interventions for the disease.

82

83 Rabbits, compared with mice, are closer to humans in terms of phylogenesis,  
84 anatomical features, physiology, and pathophysiological responses<sup>10-14</sup>, and are used  
85 as a classic lab animal species to develop novel therapeutics for humans and refine  
86 medical and surgical equipment<sup>13,15-19</sup>. Historically, retinal degeneration has been  
87 studied in rhodopsin Pro347Leu transgenic rabbits, a model of RP<sup>20-31</sup>. Recently, the  
88 emerging gene editing technology in rabbits has greatly increased their value to

89 biomedicine, motivating our efforts to develop rabbits that carry the disease causing  
90 mutations found in human patients, as models to replicate human diseases more  
91 precisely<sup>32-34</sup>. In this study, we report the development of USH2A rabbits by  
92 CRISPR/Cas9. This novel model is expected to greatly facilitate both the basic and  
93 translational studies of USH.

94

## 95 **Materials and Methods**

### 96 **Animals**

97 New Zealand White (NZW) rabbits were purchased from Covance or Charles River.  
98 The animal maintenance, care and use procedures were reviewed and approved by  
99 the Institutional Animal Care and Use Committee (IACUC) of the University of  
100 Michigan. All procedures were carried out in accordance with the approved guidelines  
101 and were performed in accordance with the ARVO (The Association for Research in  
102 Vision and Ophthalmology) Statement for the Use of Animals in Ophthalmic and  
103 Vision Research. All efforts were made to minimize suffering. All the methods were  
104 carried out in accordance with the approved guidelines.

### 105 **Reverse transcription polymerase chain reaction (RT-PCR) and real time PCR** 106 **analysis.**

107 Total RNA from retina, sclera, brain, liver, kidney, and bone marrow were isolated  
108 using the RNeasy kit (Qiagen). Reverse transcription was used to generate cDNA  
109 (SuperScript® III First-Strand Synthesis System, Thermo Fisher Scientific, 18080-05)

110 as template for RT-PCR and real time PCR. For real time PCR analysis, samples  
111 were analyzed on a BioRad CFX Connect™ Real-Time PCR Detection System and  
112 amplification was detected using the SYBR green method (BioRad, SYBR green  
113 supermix). PCR primers are as following: RTF1: 5'-aattcaggccagtgcaagtg-3', RTR1:  
114 5'-gccagaaagaggattgcag-3'; RTF2:5'-ggagaagaagagggtgtgct -3'; RTR2: 5'-  
115 gactctccactggaagctga-3'. Rabbit 18S rRNA or GAPDH expression was used as  
116 internal control. The RT-PCR products were purified and subject to Sanger  
117 sequencing.

#### 118 **Scanning electron microscopy**

119 The neuroretinas obtained from perfused rabbits were postfixed by immersion in 2.5%  
120 glutaraldehyde in 0.1 M cacodylate buffer (pH 7.3) for 2 h at room temperature. The  
121 samples were dehydrated in ethanol, dried to critical point, and fractured along a  
122 plane passing through the long axis of the photoreceptors. The fragments were  
123 mounted on aluminum stubs with double-adhesive carbon tape and examined under a  
124 scanning electron microscope.

#### 125 **Histopathology**

126 To euthanize the rabbits, euthanasia solution (Euthanasia, 0.22 mg/kg, 50 mg/mL,  
127 VetOne, ID, USA) was injected into the rabbit intravenously through the marginal ear  
128 vein. The eyeballs were harvested and fixed in Davidson's fixative solution for 24 h.  
129 The sample was then cut into 5 mm pieces and embedded in paraffin. The sample  
130 was sectioned to a thickness of 4 µm using a Leica Autostainer XL (Leica Biosystems,

131 Nussloch, Germany) and stained with hematoxylin and eosin (H&E). The H&E slides  
132 were observed using a Leica DM600 light microscope (Leica Biosystems, Nussloch,  
133 Germany) and the images were captured using a BF450C camera.

#### 134 **CRISPR reagents**

135 The Cas9 expression plasmid JDS246 was obtained from Addgene. Cas9 mRNA was  
136 transcribed *in vitro*, capped and polyadenylated using the T7 mScript™ Standard  
137 mRNA Production System (C-MSC100625, CELLSCRIPT, Madison, WI). Guide  
138 RNA (gRNA) was designed using CRISPOR software<sup>35</sup>, synthesized as chemically  
139 modified (2'-O-Methyl at 3 first and last bases, 3' phosphorothioate bonds between  
140 first 3 and last 2 bases) single strand gRNA (sgRNA EZ Kit, Synthego). The target  
141 sequence on rbUSH2A is shown in Fig. 2A. Cas9 mRNA and sgRNA were diluted in  
142 RNase-free TE buffer (1mM Tris-Cl pH 8.0, 0.1mM EDTA), stored at -80 °C in 10 µl  
143 aliquots, and were thawed and kept on ice before microinjection.

#### 144 **Rabbit genome editing**

145 Methods of rabbit genome editing has been described previously in detail<sup>36</sup>. Briefly,  
146 pronuclear stage rabbit embryos were injected with approximately 2-5 pL RNase-free  
147 TE buffer (1mM Tris-Cl pH 8.0, 0.1mM EDTA) containing 150 ng/µl Cas9 mRNA, 50  
148 ng/µl sgRNA and 50 ng/µl donor oligo. Injected embryos were washed three times in  
149 embryo culture medium, which consisted of Earle's Balanced Salt Solution (E2888,  
150 Sigma) supplemented with non-essential amino acids (M7145, Sigma), essential  
151 amino acids (B-6766, Sigma), 1 mM L-glutamine (25030-081, Life Technologies), 0.4

152 mM sodium pyruvate (11360-070, Life Technologies) and 10% FBS. Twenty to thirty  
153 embryos were surgically transferred to oviducts of each synchronized recipient doe.  
154 For gRNA validation, instead of transferring to recipients, the injected embryos were  
155 washed and cultured in the medium at 38.5 °C in 5% CO<sub>2</sub> for additional 2-3 days until  
156 they reach blastocyst stage.

#### 157 **Detection of gene editing events**

158 For gRNA *in vitro* validation, PCR products amplified the targeted USH2A gene region  
159 were purified with a PCR purification kit. The purified PCR products were mixed in a  
160 Eppendorf tube with Cas9 protein and gRNA to be tested as following: 10XNEBuffer  
161 3.1, gRNA (30 nM final), Cas9 Nuclease, *S. pyogenes* (M0386S) (~30 nM final),  
162 substrate PCR products (3 nM final), and Nuclease-free water to total reaction volume  
163 of 30 µl. The reaction solution was incubated at 37°C for 30 minutes and analyzed by  
164 gel electrophoresis.

165 For *in vivo* testing, injected embryos developed to blastocyst stage in culture were  
166 collected in 1.5 ul water individually and the whole genome was replicated using a  
167 REPLI-g® Mini Kit (Qiagen, Germantown, MD) following the manufacturer's protocol.  
168 For rabbit genotyping, genomic DNA was isolated from the newborn kits ear skin.  
169 Genomic DNA was then amplified by PCR using corresponding primers: Primers for  
170 indels detection: forward (F), 5'-tctgcagtagcattgtttgtgatt-3', reverse (R),  
171 5'-gtcccagtctcatcacagttacaa-3'; Primers for NGS sequencing: F,  
172 5'-agccctgccagtgtaacctc-3', R, 5'-agtgactgagcctgctgtgttg-3'; Primers for OT1 detection:



173 F, 5'-gaggtacaagcagggtaagaagg-3', R, 5'-gaatgaaacatggcctgggacct-3'; Primers for  
174 OT2 detection: F, 5'-gagagctggactggaagaggag-3'; R, 5'-agggtacttctgtgcgttcg-3';  
175 Primers for OT3 detection: F, 5'-tcaggagtgaatcagcagatacaa-3', R,  
176 5'-ttcggcttattcaggaaagaaatg-3'. PCR products were purified and subjected to T7E1  
177 assay, Sanger sequencing, and NGS (MGH CCIB DNA core). NGS data were  
178 analyzed using CRISPResso2 software<sup>37</sup>.

### 179 **Rabbit eye examination and imaging procedure**

180 A comprehensive examination of the eyelids, conjunctiva, cornea, anterior chamber,  
181 iris, and lens was performed using before imaging by slit lamp bio-microscopy  
182 (SL120, Carl Zeiss, Germany). Fundus photography, fundus autofluorescence (FAF),  
183 fluorescein angiography (FA), and indocyanine green angiography (ICGA) were  
184 employed to evaluate the vascular network of the retina and choroid. Briefly, after  
185 pupil dilation, a clinical fundus camera (TRC-50EX, Topcon Corporation, Tokyo,  
186 Japan) was used to acquire fundus photography, FAF, FA, and ICGA. Fluorescein  
187 sodium (0.2mL, 10% solution) (Akorn, Lake Forest, IL, USA) and indocyanine green  
188 (0.5 mg/kg, 5 mg/mL, HUB Pharmaceuticals LLC, Patheon, Italy) were injected in the  
189 rabbit marginal ear vein. Photographs were captured immediately after injection up to  
190 10 minutes to capture early, middle, and late phase angiography images. There was a  
191 5-minute interval between the two kinds of angiography tests.

192 Spectral domain optical coherence tomography (OCT) imaging was performed as  
193 described previously<sup>38</sup>. Briefly, two superluminescent light emitting diodes with a

194 center wavelength of 905 nm were used to illuminate the surface of the cornea and  
195 focused on the fundus by the rabbit eye optics. The average power of the OCT  
196 probing light was 0.8 mW. The lateral and axial resolutions are 3.8  $\mu\text{m}$  and 4.0  $\mu\text{m}$ ,  
197 respectively. The system can achieve an imaging depth of 1.9 mm. The rabbits were  
198 put on a custom-built platform, and the eye position was adjusted under the  
199 ophthalmic lens using a CCD camera to visualize the region of interest.

## 200 **Electroretinography (ERG)**

201 Full field ERG (ff-ERG) was performed after pupillary dilation. After 60 minutes of dark  
202 adaptation, rabbits were anesthetized. After topical anesthesia, ERG-Jet contact lens  
203 electrodes (The Electrode Store, Enumclaw, WA, USA) were applied. Corneal  
204 hydration was maintained with a 2.5% hypromellose ophthalmic demulcent solution  
205 (Akorn Inc, Lake Forest, IL, USA). A pair of reference electrodes and a ground  
206 electrode (needle electrodes, The Electrode Store) were placed subcutaneously  
207 behind the bilateral ears and in the scruff, respectively. All animal handling was done  
208 under dim red light. ERGs were recorded with a Ganzfeld configuration using the LKC  
209 UTAS 3000 electrophysiology system (LKC Technologies, Gaithersburg, MD, USA).  
210 ERG responses were amplified at 2500 gain at 0.312-500 Hz and digitized at a rate of  
211 2000 Hz. Scotopic ERGs were recorded at a dim flash intensity of 0.01  $\text{cd}\cdot\text{s}/\text{m}^2$  to  
212 obtain the rod isolated ERG and at 3.0  $\text{cd}\cdot\text{s}/\text{m}^2$  to obtain the combined rod-cone ERG.  
213 After 10 minutes of light adaptation to a white 32  $\text{cd}/\text{m}^2$  rod suppressing background,  
214 photopic ERGs were recorded at a flash intensity of 3.0  $\text{cd}\cdot\text{s}/\text{m}^2$ . For ERG analyses,  
215 the a-wave amplitude was measured from the pre-stimulus baseline to the trough of

216 the a-wave, and the implicit time of the a-wave was measured from flash onset to the  
217 trough of the a-wave. The b-wave amplitude was measured from the trough of the  
218 a-wave to the peak of the b-wave, and the b-wave implicit time was measured from  
219 flash onset to the peak of the b-wave. ERG recording was performed using a xenon  
220 white flash, 1000 Hz sampling frequency, 0.312 - 300 Hz cut off filter, 500 ms  
221 recording time, 10 ms baseline prior to flash, and no notch filter was used.

### 222 **Acoustic auditory brainstem responses (ABR)**

223 Auditory sensitivity of the animals is evaluated by recording auditory brainstem  
224 responses to acoustic stimuli. Rabbits are anesthetized with xylazine and ketamine  
225 (and butorphanol to prolong anesthesia) and placed on a warm water-circulating  
226 heating in a sound attenuated chamber. Needle electrodes are placed under each  
227 pinna: test ear (reference) and contralateral ear (ground) and at the vertex (active) of  
228 the animal's head to record the neural output. Tucker Davis Technologies (TDT)  
229 System III hardware and SigGen/BioSig software (TDT, Alachua, FL USA) is used to  
230 present the stimulus and record responses. Tones are delivered through an EC1  
231 driver (TDT, aluminum-shielded enclosure made in house), with the speculum placed  
232 just inside the tragus. Stimulus presentation is 15 ms tone bursts, with 1 ms rise/fall  
233 times, presented 10 per second. Up to 1024 responses are averaged for each  
234 stimulus level. Responses are collected for stimulus levels in 10 dB steps at higher  
235 stimulus levels, with additional 5 dB steps near threshold. Thresholds are interpolated  
236 between the lowest stimulus level where a response was observed, and 5 dB lower,

237 where no response is observed. ABR thresholds and suprathresholds will be tested at

238 3 or 4 frequencies (between 4 – 24 kHz). ABR sessions may last 45 - 60 min.

239

## 240 **Results**

### 241 **Usherin is highly conserved in rabbit and human**

242 The rabbit USH2A gene has two isoforms: (i) the short transcript containing 23 exons

243 that encodes 1543 amino acids (Ensemble transcript ID: ENSOCUT00000014751.4);

244 and (ii) the long transcript contains 74 exons encodes 5202 amino acids (NCBI

245 Reference Sequence: XM\_008268426.2). Analysis of protein sequences of usherin

246 revealed that Usherin is highly conserved in human and rabbit, with 84% identity

247 score for long isoforms and 85% identity score for short isoforms, and 91% positive

248 score for both isoforms (**Fig.1A**). To our interest, as shown in **Fig. 1B**, rabbit exon12

249 of USH2A is of the same length of human exon13, both are 642 bp long, which

250 notably is an in-frame length that is suitable for exon deletion-based therapy<sup>39</sup>. We

251 examined the expression profiles of USH2A gene in rabbits by real-time PCR using

252 two pairs of primers: (i) Pair 1 on exon11 and exon12, that detects both short and long

253 isoforms; and (ii) Pair 2 on exon50 and exon51, that detects only the long isoform. As

254 shown in **Fig. 1C**, both isoforms of USH2A are exclusively expressed in the rabbit

255 retina, but not in any other organs/tissues examined.

256

### 257 **Calyceal processes like structures in rabbits**

258 It has been reported that photoreceptor calyceal processes (CPs) are present in the  
259 retina of primates but absent from mice, suggesting that the presence/absence of CPs  
260 maybe the cause of the difference in visual phenotype between USH1 human patients  
261 and mice models<sup>40</sup>. It is possible that this structure (i.e. CPs) is also critical to the eye  
262 pathogenesis in USH2, as USH1 and USH2 proteins function together in higher order  
263 protein complexes<sup>41</sup>. Electron microscopy imaging results indicate that CP-like  
264 structures exist in rabbit retina (**Fig. 1D**).

265

#### 266 **Production of USH2A mutant rabbits**

267 In efforts to model USH2 in rabbits, we chose to knock in the USH2A c.2299delG  
268 mutation, the most prevalent USH2A frameshift mutation found in human USH  
269 patients<sup>5</sup>, into rabbit genome. We designed four gRNAs targeting exon 12 of the rabbit  
270 USH2A gene (**Fig.2A**). All four sgRNAs could cut their target in test tubes efficiently  
271 with Cas9 protein (**Fig.2B**). T7E1 and Sanger sequencing assay showed that sgRNA1  
272 achieved high efficiency of cleavage in rabbit embryos (**Fig.2B**). The guide RNA1  
273 selected was co-introduced to rabbit embryos with Cas9 mRNA and a donor single  
274 stranded DNA harboring the intended c.2299delG mutation and 50 nucleotides  
275 homologue arms on each side. Totally 60 injected embryos were surgically  
276 transferred into the oviduct of two synchronized recipients. All 9 term kits were  
277 identified as USH2A mutant animals with 1 of them carrying 15.08% of the  
278 c.2299delG mutation detected by ear skin deep sequencing (**Fig.2 C&D**,  
279 **supplementary Fig.1**). these data demonstrate that USH2A mutant founder rabbits

280 can be produced by CRISPR/Cas9 very efficiently. Sperm DNA analysis by targeted  
281 deep sequencing in founder that carries the c.2299delG mutation show a high  
282 percentage of presence of this mutant allele (10.22% HDR, **Fig.2D**). Among the  
283 knockout founders, one male (Founder#2) was mated with two wildtype rabbits  
284 producing 19 kits, 9 of which carried frameshift indels mutations predicted to cause  
285 premature stop codon (+14bp, -11bp, and -1 bp, **Fig.3B**). these data show that both  
286 knock-in and knockout USH2A rabbits are germline transmitting.

287

#### 288 **Off target analysis**

289 To test the off-target effects, we chose the top three potential off-target sites predicted  
290 by the gRNA design software to test off-target effects, in which the predicted off-target  
291 sites were PCR amplified and analyzed with T7E1 assay and confirmed by Sanger  
292 sequencing. No indels were detected at OT2 and OT3 in any of the nine F1 rabbits  
293 (**Fig. 3C**), whereas at off-target1 (OT1), two of the nine F1 generation rabbits showed  
294 indels (GCTG to CTC) that are located 32 bp away from the predicted Cas9 cleavage  
295 site (**Fig.3C, Supplementary Fig.2**). As this region is an intergenic region, it is more  
296 likely a natural polymorphism. Nevertheless, to avoid the potential adverse effects,  
297 these two F1 rabbits carrying the OT1 site indels were excluded from the breeding  
298 program.

299

#### 300 **Exon 12 mutation in rabbits result in nonsense-mediated mRNA decay**

301 Upon sexual maturation, one of the F1 rabbit carrying del11 mutation was used to  
302 establish the USH2A KO (USH2A<sup>-/-</sup>) line. This mutation is predicted to cause a  
303 premature stop codon, which may lead to the nonsense-mediated mRNA decay and  
304 the production of non-functional truncated Usherin. Real time PCR detection of the  
305 USH2A transcripts in the retina tissue isolated from a founder animal carrying high  
306 percentage of indels mutation (Founder #2 in **Fig.2D.**) and a USH2A KO homozygous  
307 rabbit. As shown in **Figure 4**, the expression of USH2A transcripts was decreased  
308 more than 50% in the founder animal retina compared with wildtype controls, and the  
309 expression level further decreased to less than 30% that of wildtype controls in the  
310 USH2A KO retina, indicate nonsense-mediated mRNA decay did happened in the  
311 USH2A KO rabbits. We expect that the introduced mutation results in decreased  
312 mRNA level and the residual mRNA carrying the mutation leading to premature  
313 termination of usherin translation.

#### 314 **Eye phenotype of the USH2A rabbits**

315 As shown in **Figure 5A**, USH2A KO rabbits had normal retinal and choroidal  
316 vasculature. In addition, ophthalmic examination confirmed that all USH2A rabbits  
317 had ophthalmoscopically normal and healthy corneas, anterior chambers, and clear  
318 lenses. There was no difference in the fundus appearance between WT and USH2A  
319 KO rabbits. It should be noted that these USH2A KO animals were on an albino  
320 background, and the characteristic bone spicule pigmentation of the retina seen in RP  
321 eyes would therefore not be expected. FA and ICGA imaging shows normal retinal

322 and choroidal vascular morphology. In contrast, hyper-FAF spots were detected in the  
323 retina of the USH2A KO rabbits as early as 4 months old. OCT images also indicated  
324 changes at the photoreceptor layer with hyper-reflective foci at the level of the  
325 photoreceptor IS and OS segments as early as 4 months old.

326 OCT imaging was performed on both WT and USH2A KO rabbits as illustrated in  
327 Figure 5B. B-scan OCT image obtained from WT rabbits show normal and healthy  
328 retina with the different retinal layers such as the nuclear layers, plexiform layers,  
329 photoreceptors, retinal vessels (RVs), choroidal vessels (CVs), RPE, inner limiting  
330 membrane, and sclera. No evidence of photoreceptor or RPE disruption or damaged  
331 was observed in WT rabbits. On the other hand, hyper-reflective foci were noted at  
332 the level of the photoreceptor inner and outer segments and RPE in USH2A rabbits at  
333 4 months old as marked by red dotted circle, which increased over time with more  
334 disruptions at 8 and 12 months old.

### 335 **Loss of retinal function in USH2A KO rabbits**

336 To investigate whether the disruption of USH2A gene causes retinal abnormalities,  
337 visual function of USH2A KO and WT control rabbits were compared by ERG  
338 analyses at different ages under scotopic and photopic conditions. At age 7 months,  
339 the USH2A KO rabbits displayed rod response (scotopic 24 dB), scotopic combined  
340 rod and cone response (scotopic 0dB), and photopic response b-wave amplitudes  
341 (**Fig.6A,B Fig. S3**) and 32 Hz flicker amplitudes (**Fig. 6C,D**) significantly lower than  
342 WT counterparts. The responses of USH2A KO rabbits were 10% to 20% lower than



343 those of WT control ( $P=0.0456$  and  $0.042$  respectively by t-test) as shown in **Figures**.  
344 **6B, 6D** and **Fig. S3**. At age 15-22 months, scotopic b-wave amplitudes and 32 Hz  
345 flicker amplitudes became further reduced with the responses of USH2A KO more  
346 than 50% lower than those of WT controls ( $P =0.0073$  and  $0.0031$  respectively by  
347 t-test). This age dependent decline suggests progressively loss of photoreceptor  
348 function in USH2A KO rabbits. Implicit time did not show a significant difference  
349 between WT and USH2A KO over time (**Fig. S4**).

350

#### 351 **USH2A rabbit histopathology showed reduced photoreceptor nuclei in the ONL**

352 To look for photoreceptor degeneration characteristics of Usher-associated retinitis  
353 pigmentosa, the number of photoreceptor nuclei in the outer nuclear layer (ONL),  
354 which represents the rod and cone cell bodies, of a 16 months USH2A KO rabbit was  
355 compared with age matched control rabbits. Figure **6A** shows the H&E image of WT  
356 (left) and USH2A KO (right). These H&E images clearly show thinner ONL layer in the  
357 USH2A KO rabbit retina compared with the age matched wildtype control. **Figure 7B**  
358 represent the overview of a rabbit retinal section illustrating the locations of optic  
359 nerve (Myelinated region) and visual streak as well as the 10 spots for ONL nuclear  
360 number counting in **Figure 7C**. We found that the USH2A KO rabbit has reduced  
361 photoreceptor nuclear numbers throughout the whole retina compared to the age  
362 matched controls, indicating photoreceptor cell degeneration which explained the  
363 reduced ERG signals in **Figure 6**.

364

365 **USH2A KO rabbits showed moderate to severe hearing loss**

366 USH2 affects both hearing and vision. In this study, auditory brainstem response  
367 (ABR) was tested in three USH2A KO rabbits at 5 months old. As shown in figure 7,  
368 ABR threshold at three different frequencies tested (4 kHz, 12 kHz, and 16 kHz) were  
369 all increased by 2-3 times in the USH2A KO rabbits compared with wildtype control  
370 rabbits ( $p=0.0465$ ,  $n=3$ ) (**Fig. 7**), indicating moderate to severe hearing loss in these  
371 rabbits.

372

373 **Discussion**

374 Usher syndrome type 2 is characterized by hearing loss and early adulthood-onset of  
375 RP. Retinal degeneration in patients is apparent by fundus examination and the  
376 progressive reduction in ERG amplitudes over the course of the disorder. A targeted  
377 Ush2a knock-out mouse demonstrates only mild retinal degeneration with late age of  
378 onset<sup>6</sup>. A spontaneous mutant mouse model, Kunming, shows a rapid, early-onset  
379 retinal degeneration, but contains mutations in two genes known to be involved in  
380 inherited retinal dystrophies: Ush2a and Pde6b<sup>47</sup>. Recently, bright light induction has  
381 been reported to be able to induce the damage of the rod photoreceptors in several of  
382 the USH1 and USH2 mouse models. However, these experiments were in a 129 Sv/j  
383 background, which is inherently more sensitive to light-induced photoreceptor cell  
384 damage<sup>48,49</sup>. Overall, these models only showed slightly reduced rod function

385 indicated by reduced scotopic b wave amplitude, but no cone function reduction was  
386 detected. This is probably due to their late onset features, as cones are affected later  
387 in the disease course compared with rods. Due to the short life span of the mice, it is  
388 very difficult to study USH2 disease in mouse models. Here, we have successfully  
389 established USH2A KO rabbit line. We found that targeted disruption of the USH2A  
390 gene in rabbits resulted in hearing loss and severe retinal degeneration starting as  
391 early as 4 months of age, which is equivalent to human adolescence, and showed  
392 progressive retinal degeneration mimicking the RP in USH2 patients. To our  
393 knowledge, it is the first genetic preclinical large animal model that manifest eye  
394 phenotype of USH2.

395 In humans, the location of highest acuity in the retina is a circular area termed the  
396 fovea which boasts the highest concentration of cones, the lowest concentration of  
397 rods, and much smaller receptive field sizes for all cells. The area of greatest acuity in  
398 rabbit retina is not a single point, but rather an elongated “streak” running across the  
399 retina. The presence of the visual streak made rabbits very useful for studying retinal  
400 degenerative diseases in contrast to mice. As shown in figure 6, the reduction of the  
401 ONL nuclear numbers in USH2A KO rabbits were more apparent in the visual streak  
402 area (point 6), suggesting loss of cone photoreceptors. It is reported that severe visual  
403 phenotype seen in syndromic USH2A patients compared with the non-syndromic  
404 USH2A patients could relate to a greater extent of cone dysfunction indicated by  
405 significantly reduced 30Hz-flicker ERG amplitudes<sup>50</sup>. In this study, in addition to the  
406 reduced rod function detected by the reduced scotopic b wave amplitudes in ERG, our

407 USH2A KO rabbit models also showed significantly reduced 32Hz-flicker ERG

408 amplitudes, which mimicking the cone function reduction in human patients.

409 In conclusion, we have succeeded in generating a rabbit model of USH2. Although

410 further studies are needed to fully characterize the natural history of hearing loss and

411 retinal degeneration phenotype in USH2A KO rabbits and to determine the exact

412 mechanism of photoreceptor dysfunction observed in this model, we believe that this

413 USH2A mutant rabbit model will serve as a useful large animal model with which to

414 study the pathophysiology of RP in USH and develop novel treatments. The

415 successful replication of the RP phenotype in USH2A rabbit models in this study as

416 well as the extension of gene targeting technology to rabbits by CRISPR/Cas9

417 technology motivating efforts to develop rabbit models for other types of Usher

418 Syndrome as well as other hereditary retinal diseases.

419

## 420 **Figure legends**

421 **Figure 1. USH2A is conserved in rabbit and human. (A).** Rabbit vs human Usherin

422 protein long isoform sequence alignment using BlastP program. **(B).** Genomic DNA

423 sequence alignment of rabbit exon 12 vs human exon 13 using BlastN program. **(C).**

424 Real-time PCR detection of USH2A variants in adult rabbit organs. Primer pair

425 1(RTF1,RTR1) detects both variant 1 and variant 2 (v1+v2, blue bar); Primer pair

426 2(RTF2,RTR2) detects variant 2 only (orange bar). Values were normalized to18S

427 rRNA expression. Y axes show the fold change relative to the expression level in

428 brain. Error bars represent Standard Deviation. **(D)**. Scanning electron microscopy  
429 shown Calyceal Processes like structures (CPLs) in rabbit photoreceptors. IS/OS:  
430 inner and outer segments of rod and cone photoreceptor cells.

431

432 **Figure 2. Production of USH2A mutant rabbits. (A)**. Illustration of CRISPR/Cas9  
433 mediated targeting strategy to produce rbUSH2A mutant rabbits. **(B)**. Four candidate  
434 sgRNA were designed and tested in vitro (left panel). sgRNA1 was validated in rabbit  
435 embryos using T7E1 analysis (right panel). In right panel, each lane representative  
436 one injected embryos. The PCR product of 479 bp will be cleaved into 238 bp and 241  
437 bp bands if the embryos have indels generated at the gRNA target. M, NEB 100 bp  
438 DNA ladder. **(C)**. Production of the USH2A mutant founder rabbits through embryo  
439 transfer. **(D)**. Representative NGS analysis of the founder rabbits ear biopsy showed  
440 high frequencies of both indels (NHEJ) and knock-in (HDR) mutations (left and mid  
441 panel). The germline transmission of the mutations was confirmed by targeted deep  
442 sequencing in semen collected from the knock in founder.

443

444 **Figure 3. USH2A KO line establishment and off-target analysis**

445 **(A)**. Breeding of the founder male rabbit mated with two female wildtype rabbits. **(B)**.  
446 Mutated USH2A DNA sequence and the predicted protein sequence found in the F1  
447 generation USH2A KO rabbits. **(C)**. Detection of off-target indels using T7E1 analysis  
448 in F1 generation USH2A mutant rabbits with a wild-type rabbit as control. Red arrow

449 heads showing the indels detected at off-target 1 locus in F1 generation kits #2 and #6.  
450 M, NEB 100 bp ladder DNA marker; On, on-target sequences; Off, off-target  
451 sequences; Nucleotides in red color indicate the mismatches of the gRNA and the  
452 potential off-target sequence. NGG/NGA PAMs were highlighted by underlines.

453

454 **Figure 4. USH2A expression in USH2A KO rabbit retina.** Real-time PCR detection  
455 of USH2A variants in retina tissue of a USH2A KO rabbit using the primer pair 1 in  
456 Fig.1, which detects both long and short variants of USH2A. Values were normalized  
457 to GAPDH RNA expression. Y axes show the fold change relative to the expression  
458 level in wild type controls (3 animals). Error bars represent Standard Deviation.

459

460 **Figure 5. Retinal imaging in USH2A KO rabbit.** **A).** Fundus photographs  
461 (Fundus), fundus autofluorescence (FAF), indocyanine green angiography (ICGA),  
462 and fluorescein angiography (FA) images obtained from a USH2A KO rabbit at  
463 4-month-old to 12-month-old demonstrating hyper-FAF spots (arrows). **B).** Spectral  
464 domain optical coherence tomography (OCT) images of a USH2A KO rabbit at  
465 4-month-old to 12-month-old demonstrating hyper-reflective foci at the level of the  
466 photoreceptor IS and OS segments in the photoreceptor layer (red dotted circles).

467

468 **Figure 6. Progressive retinal degeneration in USH2A KO rabbits**

469 **A).** Representative rod ERGs recorded at scotopic -24 dB flash from a 15-month-old  
470 USH2A KO rabbit with an age matched wild-type rabbit as Control. **B).** Full field  
471 electroretinography (ERG) demonstrated a significant reduction in rod response  
472 amplitude at 7 months that is further reduced at 15-22 months in USH2A KO rabbits  
473 compared with age matched wildtype (WT) rabbits. **C).** Representative ERGs  
474 recorded at 0 dB 32Hz flicker demonstrating cone response from a 15-month-old  
475 USH2A KO rabbit with an age matched wild-type rabbit as control. **D).** A significant  
476 reduction in amplitude of cone ERGs by 7 months that is consistent and further  
477 reduced at 15-22 months were recorded in USH2A KO rabbits compared with age  
478 matched wildtype (WT) rabbits. ICGA: indocyanine green angiography, FA:  
479 fluorescein angiography, RVs: Retinal vessels. ILM: Inner Limiting Membrane. RPE:  
480 Retinal pigment epithelium. CVs: Choroidal Vessels. OD: Right eye; OS: Left eye.  
481 Data analyzed by unpaired t-test, \*  $p < 0.05$ , \*\*  $p < 0.01$ .

482

483 **Figure 7. Histopathology analysis of USH2A KO rabbit retina. A).** Representative  
484 retinal section prepared from a 16 months USH2A KO rabbit stained with H&E show  
485 reduced retinal layer thickness compared with age-matched wildtype (WT). Scale  
486 bars 75  $\mu\text{m}$ . **B).** overview of a rabbit retinal section illustrating the locations for ONL  
487 nuclear number counting in Panel C. **C).** Counting of ONL layer nuclei numbers in a  
488 defined field of view (150  $\mu\text{m}$  along the retina layer) at different locations on the retina  
489 indicated in panel B. Error bars represent SD. RGC: Retinal Ganglion cell layer; IPL:  
490 Inner plexiform layer; INL: Inner nuclear layer; OPL: Outer plexiform layer; ONL: Outer

491 nuclear layer; IS/OS: Inner and Outer segments of rod and cone photoreceptor cells;

492 RPE: Retinal pigment epithelium; CL: Choroid layer.

493 **Figure 8. Hearing loss in USH2A KO rabbits.** Auditory brainstem response (ABR) test

494 demonstrating significant hearing loss in the USH2A KO rabbits at 5 months old compared

495 with wildtype (WT) control rabbits ( $p=0.0139$ ,  $n=3$ ).

496

497

498 **Reference:**

- 499 1 Mathur, P. & Yang, J. Usher syndrome: Hearing loss, retinal degeneration and associated  
500 abnormalities. *Biochimica et biophysica acta* **1852**, 406-420,  
501 doi:10.1016/j.bbdis.2014.11.020 (2015).
- 502 2 Boughman, J. A., Vernon, M. & Shaver, K. A. Usher syndrome: definition and estimate of  
503 prevalence from two high-risk populations. *Journal of chronic diseases* **36**, 595-603 (1983).
- 504 3 Rosenberg, T., Haim, M., Hauch, A.-M. & Parving, A. The prevalence of Usher syndrome and  
505 other retinal dystrophy-hearing impairment associations. *Clinical genetics* **51**, 314-321,  
506 doi:doi:10.1111/j.1399-0004.1997.tb02480.x (1997).
- 507 4 Seyedahmadi, B. J., Rivolta, C., Keene, J. A., Berson, E. L. & Dryja, T. P. Comprehensive  
508 screening of the USH2A gene in Usher syndrome type II and non-syndromic recessive  
509 retinitis pigmentosa. *Exp Eye Res* **79**, 167-173, doi:10.1016/j.exer.2004.03.005 (2004).
- 510 5 Dreyer, B. *et al.* A common ancestral origin of the frequent and widespread 2299delG USH2A  
511 mutation. *American journal of human genetics* **69**, 228-234 (2001).
- 512 6 Liu, X. *et al.* Usherin is required for maintenance of retinal photoreceptors and normal  
513 development of cochlear hair cells. *Proceedings of the National Academy of Sciences of the*  
514 *United States of America* **104**, 4413-4418, doi:10.1073/pnas.0610950104 (2007).
- 515 7 Reiners, J., Nagel-Wolfrum, K., Jurgens, K., Marker, T. & Wolfrum, U. Molecular basis of  
516 human Usher syndrome: deciphering the meshes of the Usher protein network provides  
517 insights into the pathomechanisms of the Usher disease. *Exp Eye Res* **83**, 97-119,  
518 doi:10.1016/j.exer.2005.11.010 (2006).
- 519 8 Baux, D. *et al.* Molecular and in silico analyses of the full-length isoform of usherin identify  
520 new pathogenic alleles in Usher type II patients. *Human mutation* **28**, 781-789,  
521 doi:10.1002/humu.20513 (2007).
- 522 9 Han, S. *et al.* Knockout of ush2a gene in zebrafish causes hearing impairment and late onset  
523 rod-cone dystrophy. *Human genetics* **137**, 779-794, doi:10.1007/s00439-018-1936-6 (2018).



- 524 10 Li, W. H., Gouy, M., Sharp, P. M., O'HUigin, C. & Yang, Y. W. Molecular phylogeny of  
525 Rodentia, Lagomorpha, Primates, Artiodactyla, and Carnivora and molecular clocks. *Proc*  
526 *Natl Acad Sci U S A* **87**, 6703-6707 (1990).
- 527 11 Graur, D., Duret, L. & Gouy, M. Phylogenetic position of the order Lagomorpha (rabbits,  
528 hares and allies). *Nature* **379**, 333-335 (1996).
- 529 12 Woodruff-Pak, D. S. & Trojanowski, J. Q. The older rabbit as an animal model: implications  
530 for Alzheimer's disease. *Neurobiol Aging* **17**, 283-290 (1996).
- 531 13 Fan, J. *et al.* Rabbit models for the study of human atherosclerosis: from pathophysiological  
532 mechanisms to translational medicine. *Pharmacol Ther* **146**, 104-119,  
533 doi:10.1016/j.pharmthera.2014.09.009 (2015).
- 534 14 Zernii, E. Y. *et al.* Rabbit Models of Ocular Diseases: New Relevance for Classical  
535 Approaches. *CNS & neurological disorders drug targets* **15**, 267-291 (2016).
- 536 15 Woodruff-Pak, D. S., Agelan, A. & Del Valle, L. A rabbit model of Alzheimer's disease: valid  
537 at neuropathological, cognitive, and therapeutic levels. *J Alzheimers Dis* **11**, 371-383 (2007).
- 538 16 Peng, X., Knouse, J. A. & Hernon, K. M. Rabbit Models for Studying Human Infectious  
539 Diseases. *Comparative Medicine* **65**, 499-507 (2015).
- 540 17 Del Amo, E. M. & Urtti, A. Rabbit as an animal model for intravitreal pharmacokinetics:  
541 Clinical predictability and quality of the published data. *Experimental eye research* **137**,  
542 111-124, doi:10.1016/j.exer.2015.05.003 (2015).
- 543 18 Li, W. *et al.* Acute kidney injury induced by various pneumoperitoneum pressures in a rabbit  
544 model of mild and severe hydronephrosis. *Urologia internationalis* **94**, 225-233,  
545 doi:10.1159/000362845 (2015).
- 546 19 Togoe, E. B. *et al.* Animal model of chronic kidney disease using a unilateral technique of  
547 renal ischemia and reperfusion in White New Zealand rabbits. *Acta chirurgica brasileira* **29**,  
548 651-657 (2014).
- 549 20 Kondo, M. *et al.* Generation of a transgenic rabbit model of retinal degeneration. *Invest*  
550 *Ophthalmol Vis Sci* **50**, 1371-1377, doi:10.1167/iovs.08-2863 (2009).
- 551 21 Yokoyama, D. *et al.* Pharmacological dissection of multifocal electroretinograms of rabbits  
552 with Pro347Leu rhodopsin mutation. *Japanese journal of ophthalmology* **54**, 458-466,  
553 doi:10.1007/s10384-010-0842-9 (2010).
- 554 22 Hirota, R. *et al.* Photoreceptor and post-photoreceptor contributions to photopic ERG  
555 a-wave in rhodopsin P347L transgenic rabbits. *Invest Ophthalmol Vis Sci* **53**, 1467-1472,  
556 doi:10.1167/iovs.11-9006 (2012).
- 557 23 Ueno, S. *et al.* Focal cone ERGs of rhodopsin Pro347Leu transgenic rabbits. *Vision research*  
558 **91**, 118-123, doi:10.1016/j.visres.2013.08.006 (2013).
- 559 24 Asakawa, K. *et al.* Functional and morphological study of retinal photoreceptor cell  
560 degeneration in transgenic rabbits with a Pro347Leu rhodopsin mutation. *Japanese journal of*  
561 *ophthalmology* **59**, 353-363, doi:10.1007/s10384-015-0400-6 (2015).
- 562 25 Nakagami, Y. *et al.* Cytoprotective Effects of a Novel Nrf2 Activator, RS9, in Rhodopsin  
563 Pro347Leu Rabbits. *Current eye research* **41**, 1123-1126,  
564 doi:10.3109/02713683.2015.1078362 (2016).
- 565 26 Nagai, N. *et al.* Long-Term Protection of Genetically Ablated Rabbit Retinal Degeneration by  
566 Sustained Transscleral Unoprostone Delivery. *Invest Ophthalmol Vis Sci* **57**, 6527-6538,  
567 doi:10.1167/iovs.16-20453 (2016).

- 568 27 Kominami, T. *et al.* Contributions of Second- and Third-Order Retinal Neurons to Cone  
569 Electroretinograms After Loss of Rod Function in Rhodopsin P347L Transgenic Rabbits.  
570 *Invest Ophthalmol Vis Sci* **58**, 1417-1424, doi:10.1167/iovs.16-20344 (2017).
- 571 28 Okado, S. *et al.* Temporal Properties of Flicker ERGs in Rabbit Model of Retinitis  
572 Pigmentosa. *Invest Ophthalmol Vis Sci* **58**, 5518-5525, doi:10.1167/iovs.17-22332 (2017).
- 573 29 Asakawa, K. *et al.* Histopathological Changes of Inner Retina, Optic Disc, and Optic Nerve in  
574 Rabbit with Advanced Retinitis Pigmentosa. *Neuro-ophthalmology (Aeolus Press)* **40**,  
575 286-291, doi:10.1080/01658107.2016.1229339 (2016).
- 576 30 Kominami, T. *et al.* Electrically Evoked Potentials Are Reduced Compared to Axon Numbers  
577 in Rhodopsin P347L Transgenic Rabbits With Severe Photoreceptor Degeneration. *Invest*  
578 *Ophthalmol Vis Sci* **60**, 2543-2550, doi:10.1167/iovs.19-26972 (2019).
- 579 31 Ueno, S. *et al.* Course of loss of photoreceptor function and progressive Müller cell gliosis in  
580 rhodopsin P347L transgenic rabbits. *Exp Eye Res* **184**, 192-200,  
581 doi:10.1016/j.exer.2019.04.026 (2019).
- 582 32 Yang, D. *et al.* Effective gene targeting in rabbits using RNA-guided Cas9 nucleases. *J Mol*  
583 *Cell Biol* **6**, 97-99, doi:10.1093/jmcb/mjt047 (2014).
- 584 33 Zhang, J. *et al.* Deficiency of Cholesteryl Ester Transfer Protein Protects Against  
585 Atherosclerosis in Rabbits. *Arterioscler Thromb Vasc Biol* **37**, 1068-1075,  
586 doi:10.1161/ATVBAHA.117.309114 (2017).
- 587 34 Niimi, M. *et al.* ApoE knockout rabbits: A novel model for the study of human  
588 hyperlipidemia. *Atherosclerosis* **245**, 187-193 (2016).
- 589 35 Concordet, J.-P. & Haeussler, M. CRISPOR: intuitive guide selection for CRISPR/Cas9  
590 genome editing experiments and screens. *Nucleic acids research* **46**, W242-W245,  
591 doi:10.1093/nar/gky354 (2018).
- 592 36 Yang, D., Xu, J. & Chen, Y. E. Generation of Rabbit Models by Gene Editing Nucleases.  
593 *Methods in molecular biology (Clifton, N.J.)* **1874**, 327-345,  
594 doi:10.1007/978-1-4939-8831-0\_19 (2019).
- 595 37 Clement, K. *et al.* CRISPResso2 provides accurate and rapid genome editing sequence  
596 analysis. *Nature Biotechnology* **37**, 224-226, doi:10.1038/s41587-019-0032-3 (2019).
- 597 38 Tian, C., Zhang, W., Mordovanakis, A., Wang, X. & Paulus, Y. M. Noninvasive chorioretinal  
598 imaging in living rabbits using integrated photoacoustic microscopy and optical coherence  
599 tomography. *Optics Express* **25**, 15947-15955, doi:10.1364/OE.25.015947 (2017).
- 600 39 Pendse, N. *et al.* Exon 13-skipped USH2A protein retains functional integrity in mice,  
601 suggesting an exo-skipping therapeutic approach to treat USH2A-associated disease. *bioRxiv*,  
602 2020.2002.2004.934240, doi:10.1101/2020.02.04.934240 (2020).
- 603 40 Sahly, I. *et al.* Localization of Usher 1 proteins to the photoreceptor calyceal processes, which  
604 are absent from mice. *The Journal of cell biology* **199**, 381-399, doi:10.1083/jcb.201202012  
605 (2012).
- 606 41 Sorusch, N. *et al.* Characterization of the ternary Usher syndrome SANS/ush2a/whirlin protein  
607 complex. *Human molecular genetics* **26**, 1157-1172, doi:10.1093/hmg/ddx027 (2017).
- 608 42 Lenassi, E., Saihan, Z., Bitner-Glindzicz, M. & Webster, A. R. The effect of the common  
609 c.2299delG mutation in USH2A on RNA splicing. *Experimental Eye Research* **122**, 9-12,  
610 doi:<https://doi.org/10.1016/j.exer.2014.02.018> (2014).

- 611 43 Mou, H. *et al.* CRISPR/Cas9-mediated genome editing induces exon skipping by alternative  
612 splicing or exon deletion. *Genome Biol* **18**, 108, doi:10.1186/s13059-017-1237-8 (2017).
- 613 44 Prykhozhij, S. V., Steele, S. L., Razaghi, B. & Berman, J. N. A rapid and effective method for  
614 screening, sequencing and reporter verification of engineered frameshift mutations in  
615 zebrafish. *Dis Model Mech* **10**, 811-822, doi:10.1242/dmm.026765 (2017).
- 616 45 Sharpe, J. J. & Cooper, T. A. Unexpected consequences: exon skipping caused by  
617 CRISPR-generated mutations. *Genome Biol* **18**, 109, doi:10.1186/s13059-017-1240-0 (2017).
- 618 46 Sui, T. T. *et al.* CRISPR-induced exon skipping is dependent on premature termination codon  
619 mutations. *Genome Biology* **19**, doi:ARTN 164  
10.1186/s13059-018-1532-z (2018).
- 620 10.1186/s13059-018-1532-z (2018).
- 621 47 Yao, L. *et al.* The Time Course of Deafness and Retinal Degeneration in a Kunming Mouse  
622 Model for Usher Syndrome. *PloS one* **11**, e0155619, doi:10.1371/journal.pone.0155619  
623 (2016).
- 624 48 Peng, Y. W., Zallocchi, M., Wang, W. M., Delimont, D. & Cosgrove, D. Moderate  
625 light-induced degeneration of rod photoreceptors with delayed transducin translocation in  
626 shaker1 mice. *Invest Ophthalmol Vis Sci* **52**, 6421-6427, doi:10.1167/iovs.10-6557 (2011).
- 627 49 Tian, M. *et al.* Photoreceptors in whirler mice show defective transducin translocation and are  
628 susceptible to short-term light/dark changes-induced degeneration. *Exp Eye Res* **118**, 145-153,  
629 doi:10.1016/j.exer.2013.10.021 (2014).
- 630 50 Sengillo, J. D. *et al.* Electroretinography Reveals Difference in Cone Function between  
631 Syndromic and Nonsyndromic USH2A Patients. *Scientific reports* **7**, 11170,  
632 doi:10.1038/s41598-017-11679-y (2017).

633

634 **Acknowledgements**

635 This work was supported by National Institutes of Health grants, R01-HL147527  
636 (YEC), R21 GM140359-01 (DY), K08EY027458 (YMP), Alcon Research Institute  
637 Young Investigator Grant (YMP), unrestricted departmental support from Research to  
638 Prevent Blindness, and the University of Michigan Department of Ophthalmology and  
639 Visual Sciences. This research utilized the Core Center for Vision Research funded  
640 by the National Eye Institute (P30 EY007003).

641 **Author contributions statement**

642 D.Y, Y.M.P., Y.P and Y.E.C conceived the experiments. D.Y, Y.M.P, V.P. N, J.S, Y. L,  
643 D.P, D.D, J.X, and J.Z, conducted the experiments. D.Y, Y.M.P, K.T.J and Y.E.C  
644 analyzed the results and wrote the manuscript. All authors critically reviewed the  
645 manuscript.

646 **Additional information**

647 **Competing financial interests:** The authors declare no competing financial interests.

**Figure 1. USH2A gene is highly conserved in rabbits and humans**

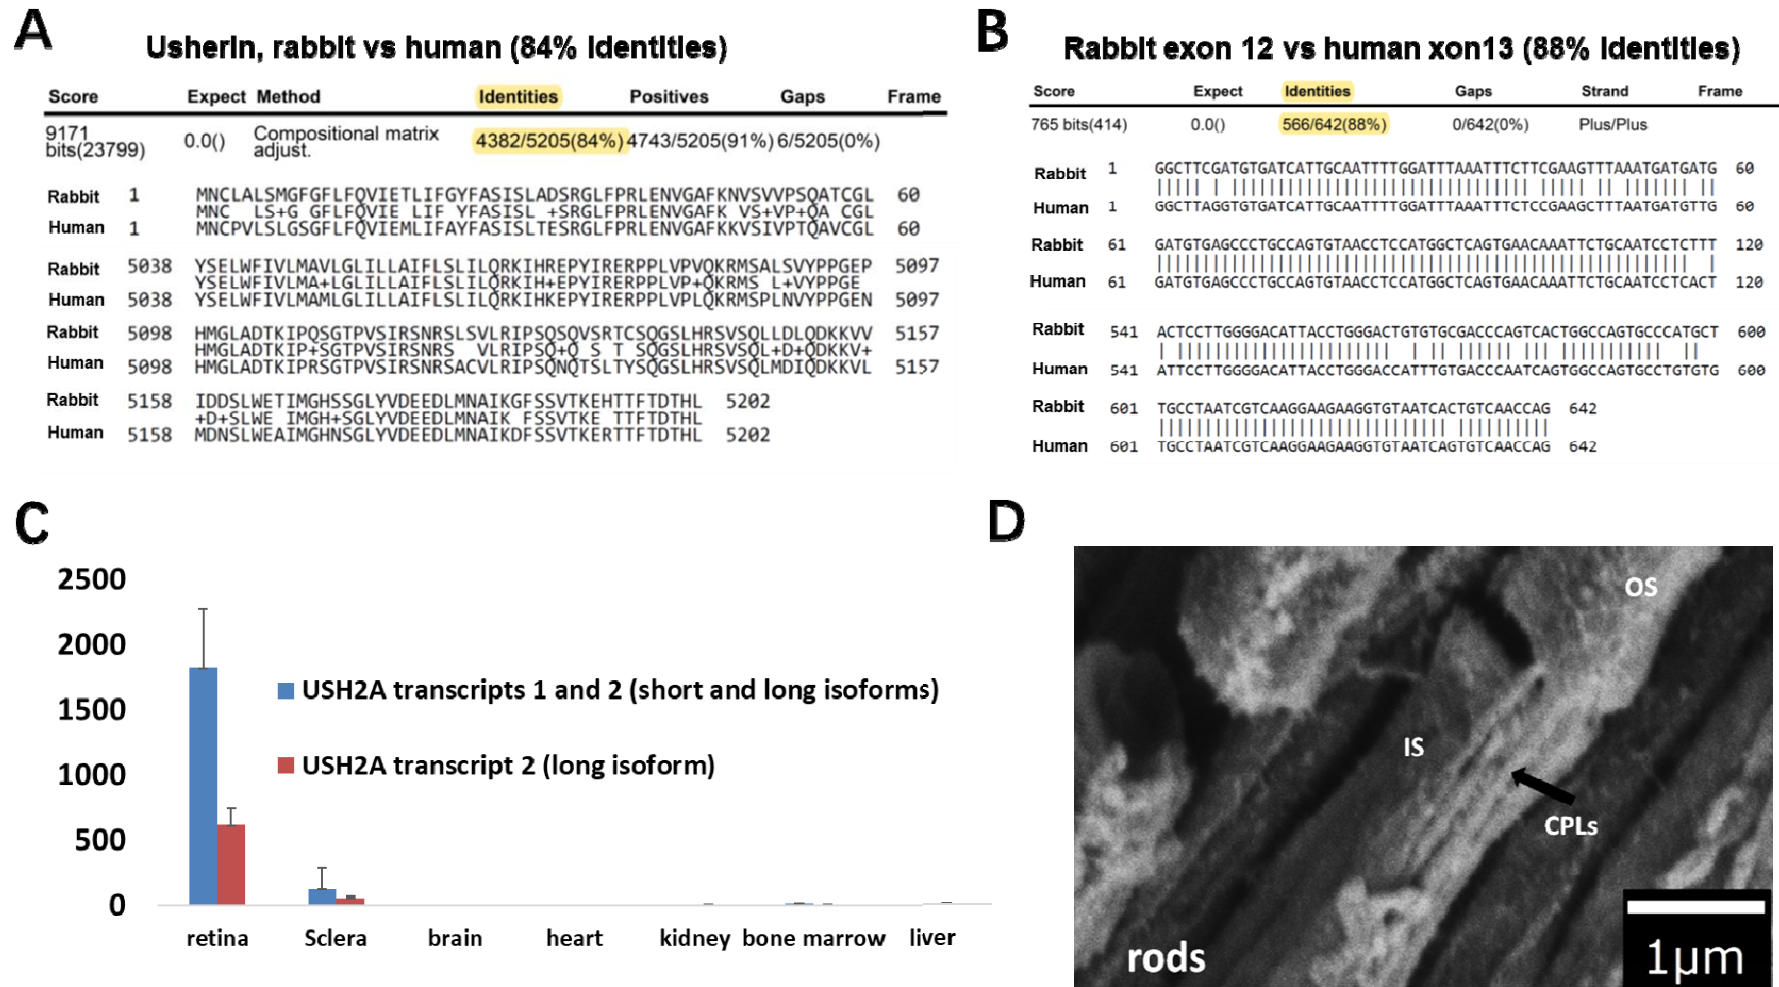

Figure 2. Production of USH2A mutant rabbits

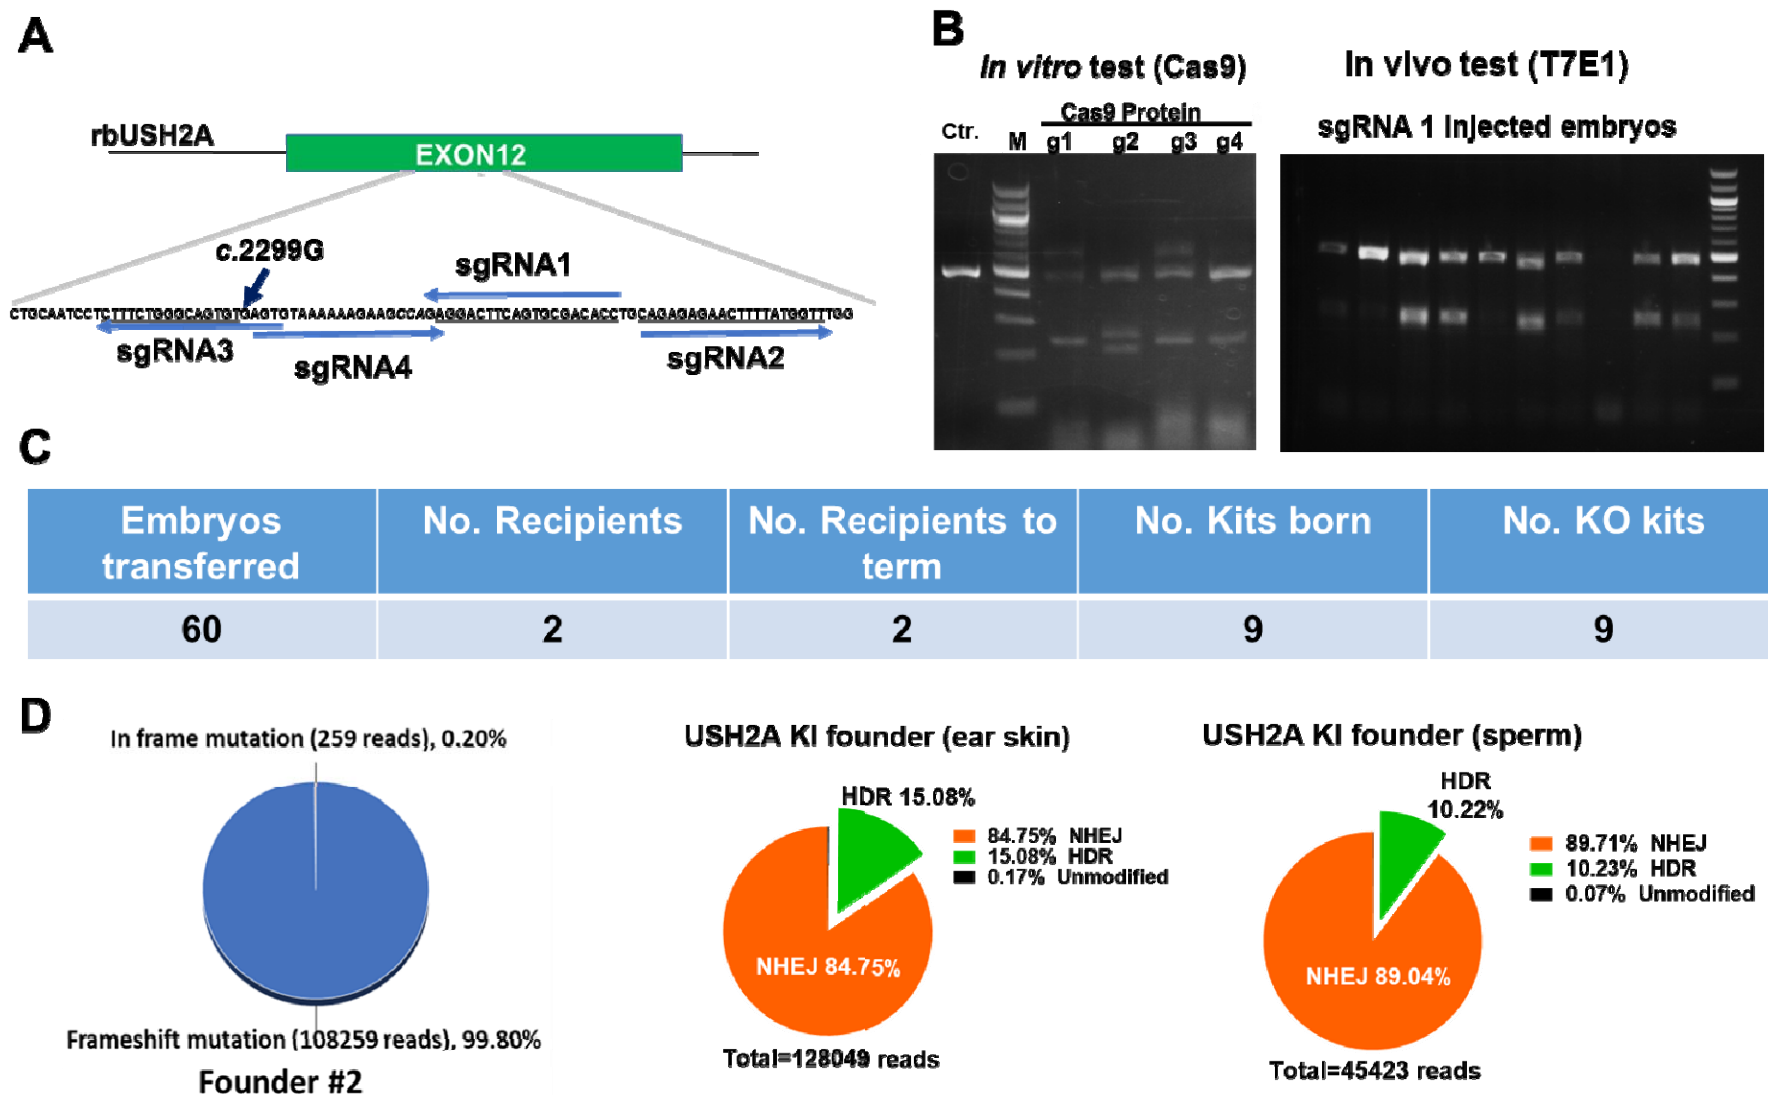



### Figure 3. USH2A KO line establishment and off-target analysis

**A**

| Male       | Female    | Kits | USH2A mutant | Germline transmission |
|------------|-----------|------|--------------|-----------------------|
| Founder #2 | Wild-type | 19   | 9            | Yes                   |

**B**

| Genotype                                    | DNA sequence                                             | Predicted Protein sequence                      |
|---------------------------------------------|----------------------------------------------------------|-------------------------------------------------|
| Wildtype                                    | GAGTGTAAAAAGAAGCCAGAG-----GACTTCAGTGCG                   | ECKKEARGLQCDTCRENFYGLDVTD.....X                 |
| <i>c. 2315_2325 del11<br/>p. R773Vfs*17</i> | GAGTGTAAAAAGAAG-----CAGTGCG                              | ECKKEA <b>VRHLQRELLWFGCHRLX</b>                 |
| <i>c.2321_2334ins14<br/>p. G774Efs*106</i>  | GAGTGTAAAAAGAAGCCAGAG <b>TAACCTTTGTTACT</b> GACTTCAGTGCG | ECKKEAR <b>VTFVTD</b> FSA <b>TPAERTF</b> .....X |
| <i>c.2321insA<br/>p.G774Efs*20</i>          | GAGTGTAAAAAGAAGCCAGAG ----- <b>AGACTTCAGTGCG</b>         | ECKKEAR <b>ETSVRHLQRELLWFGCHRLX</b>             |

**C**

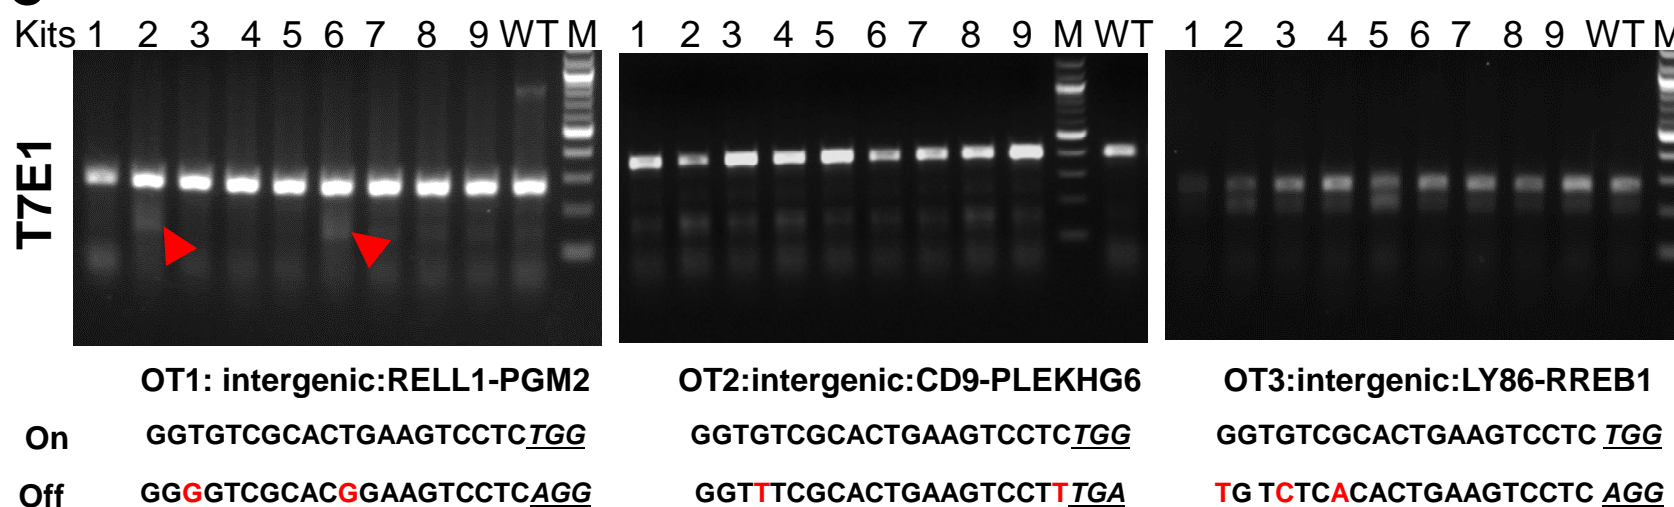

Figure 4. USH2A expression in USH2A KO rabbit retina

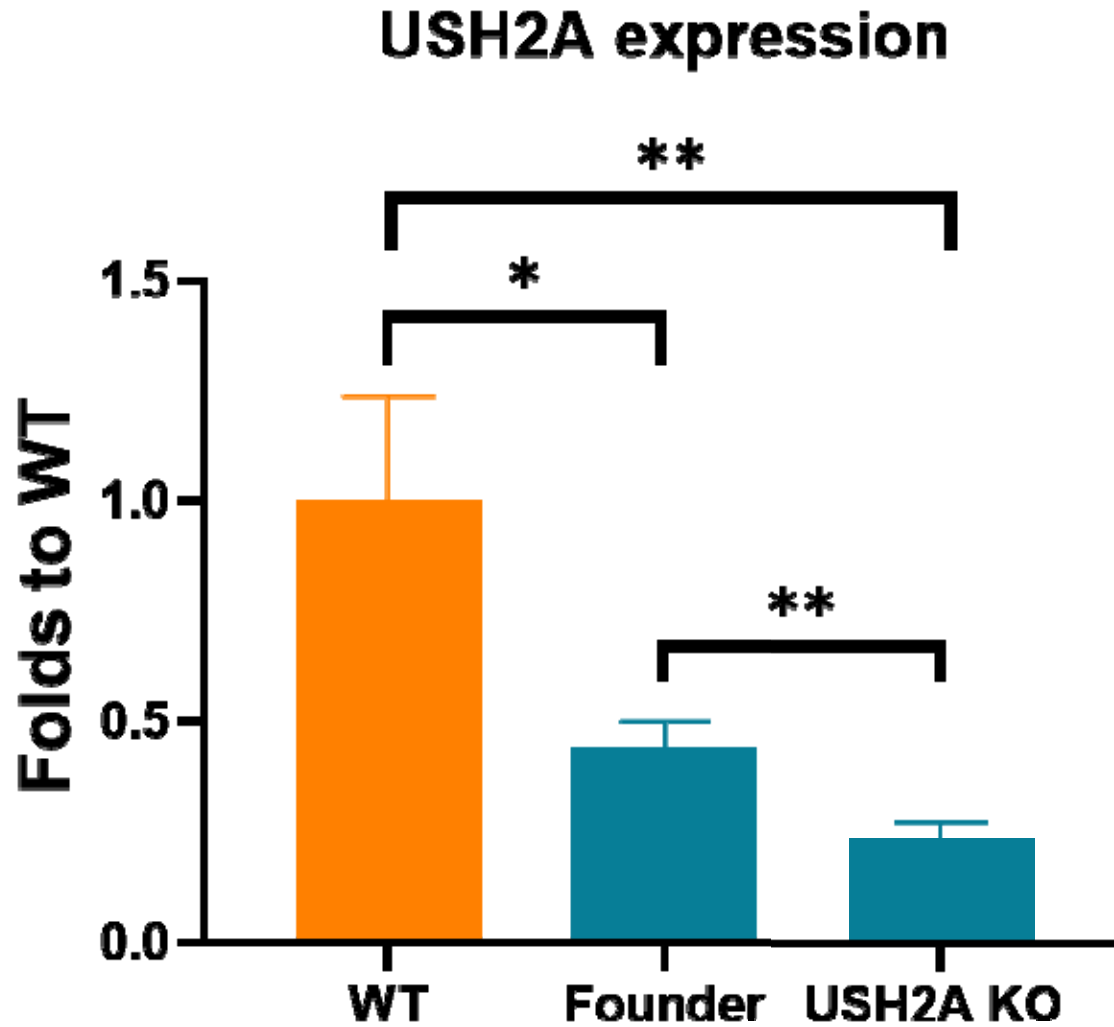



Figure 5. Retinal imaging in USH2A KO rabbit

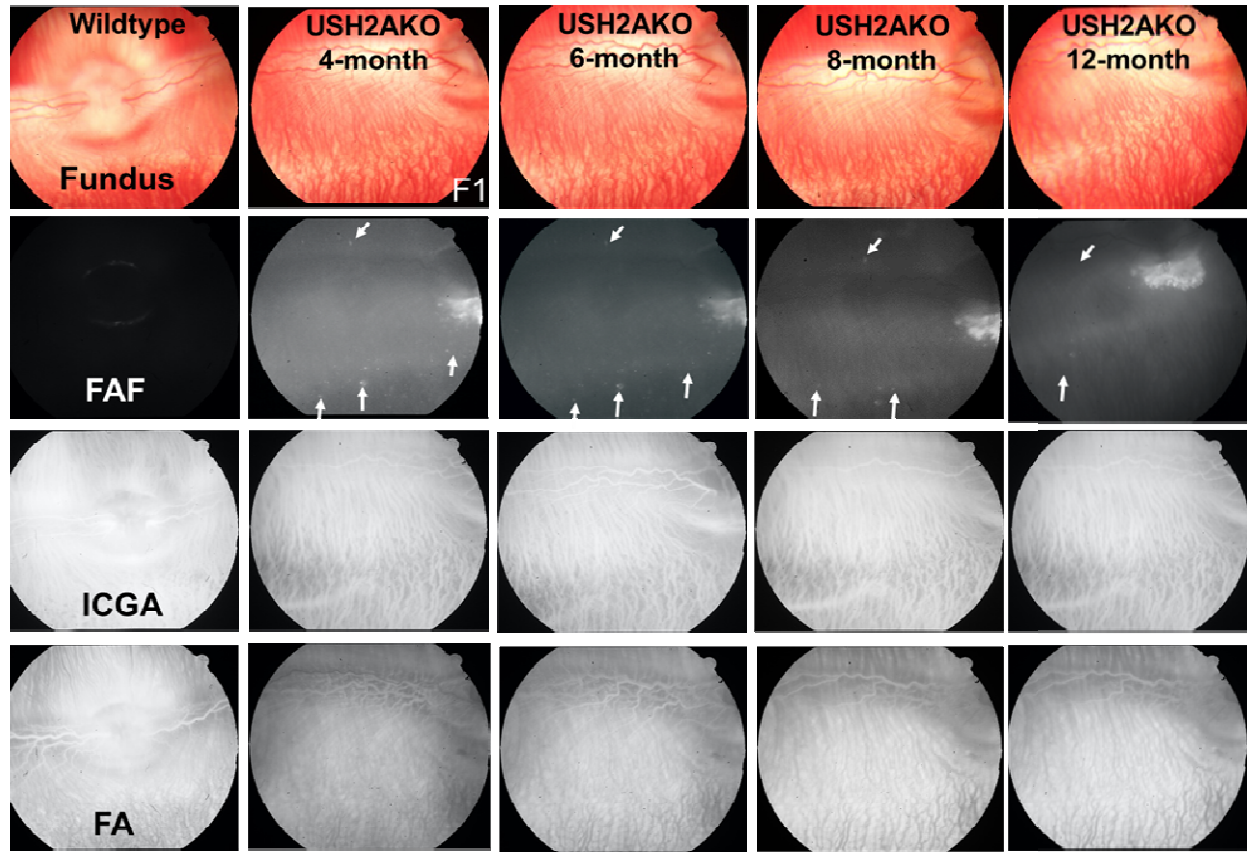

**B**

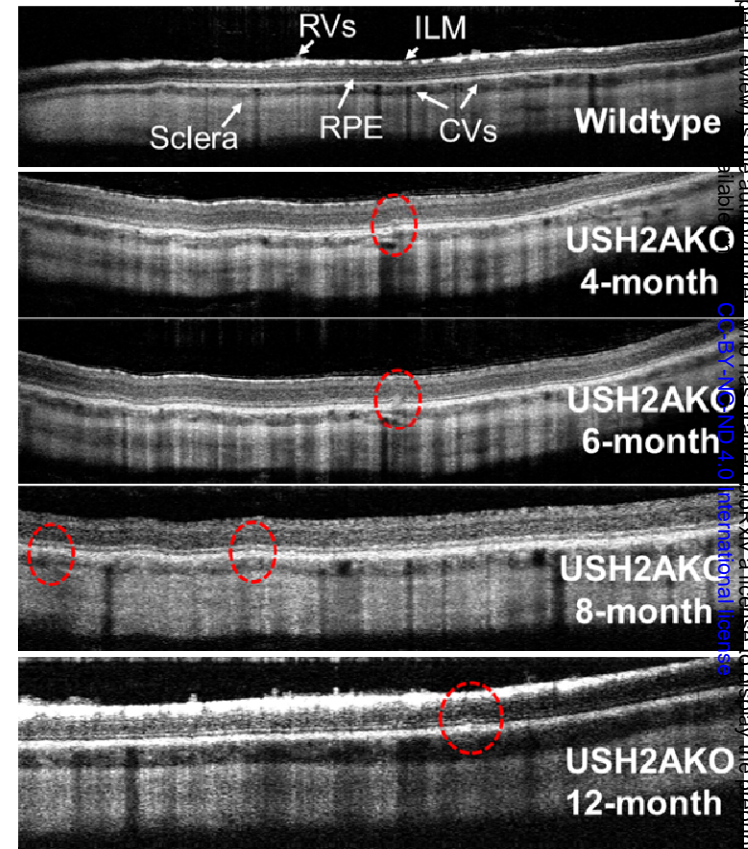

**Figure 6. Progressive retina degeneration in USH2A KO rabbits**

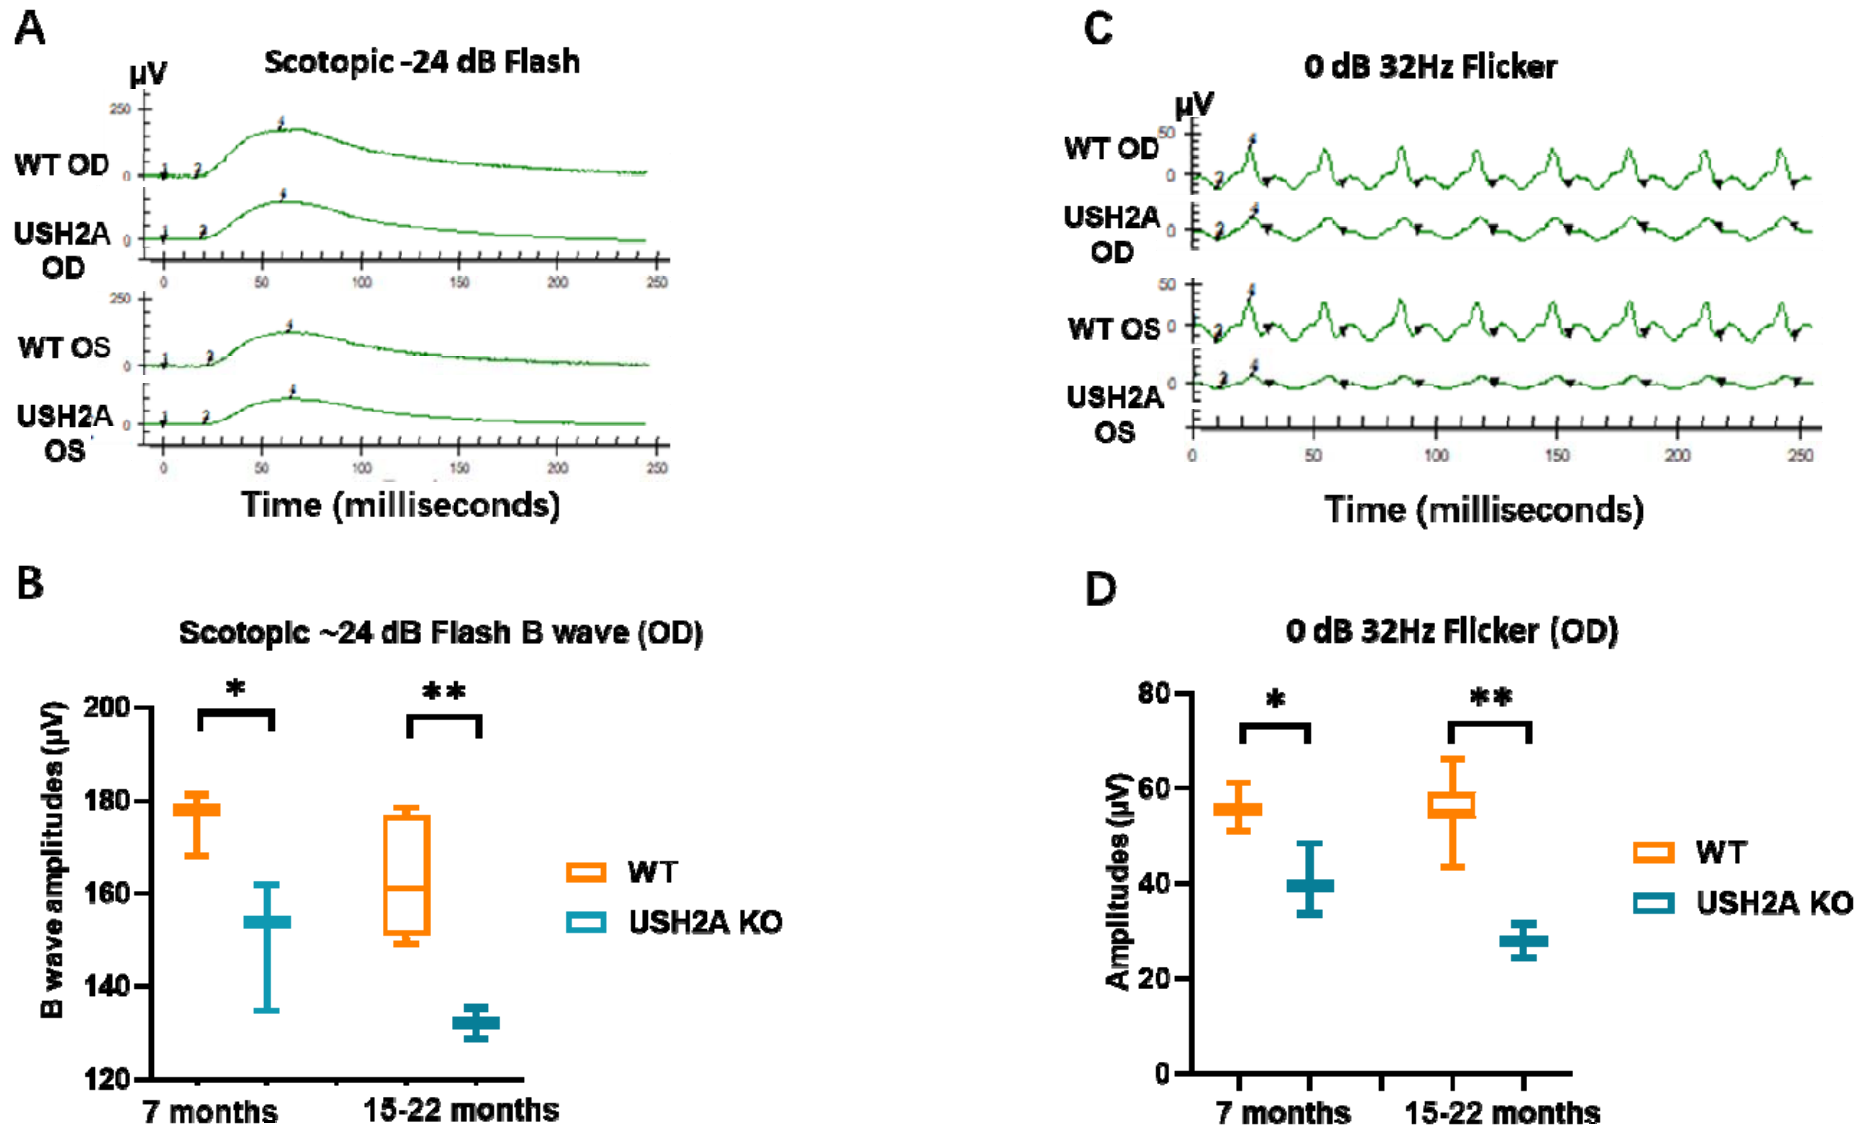

**Figure 7. Photo receptor loss in USH2A KO rabbit**

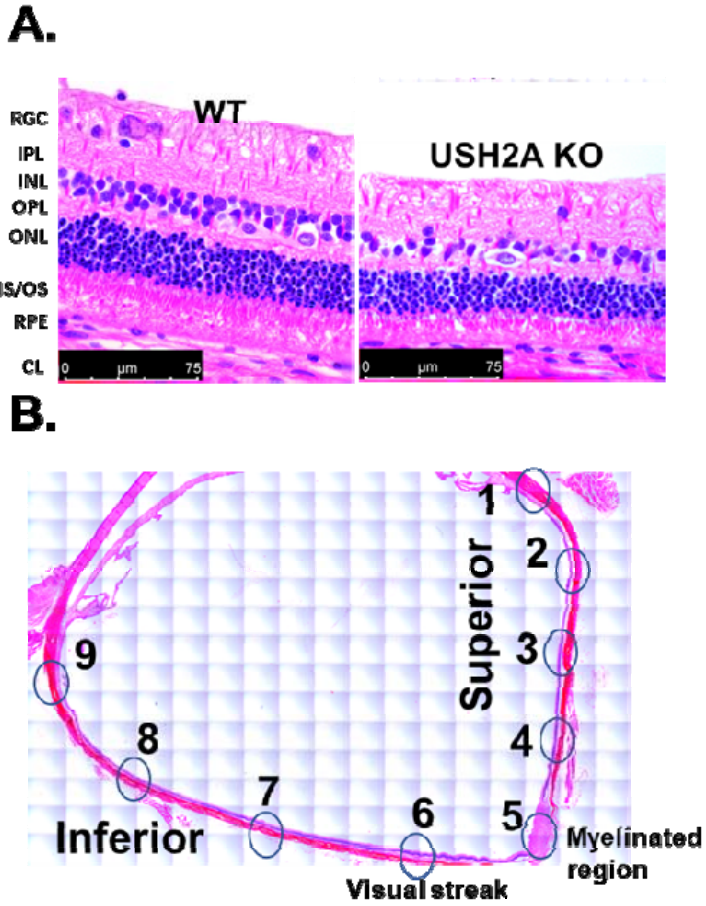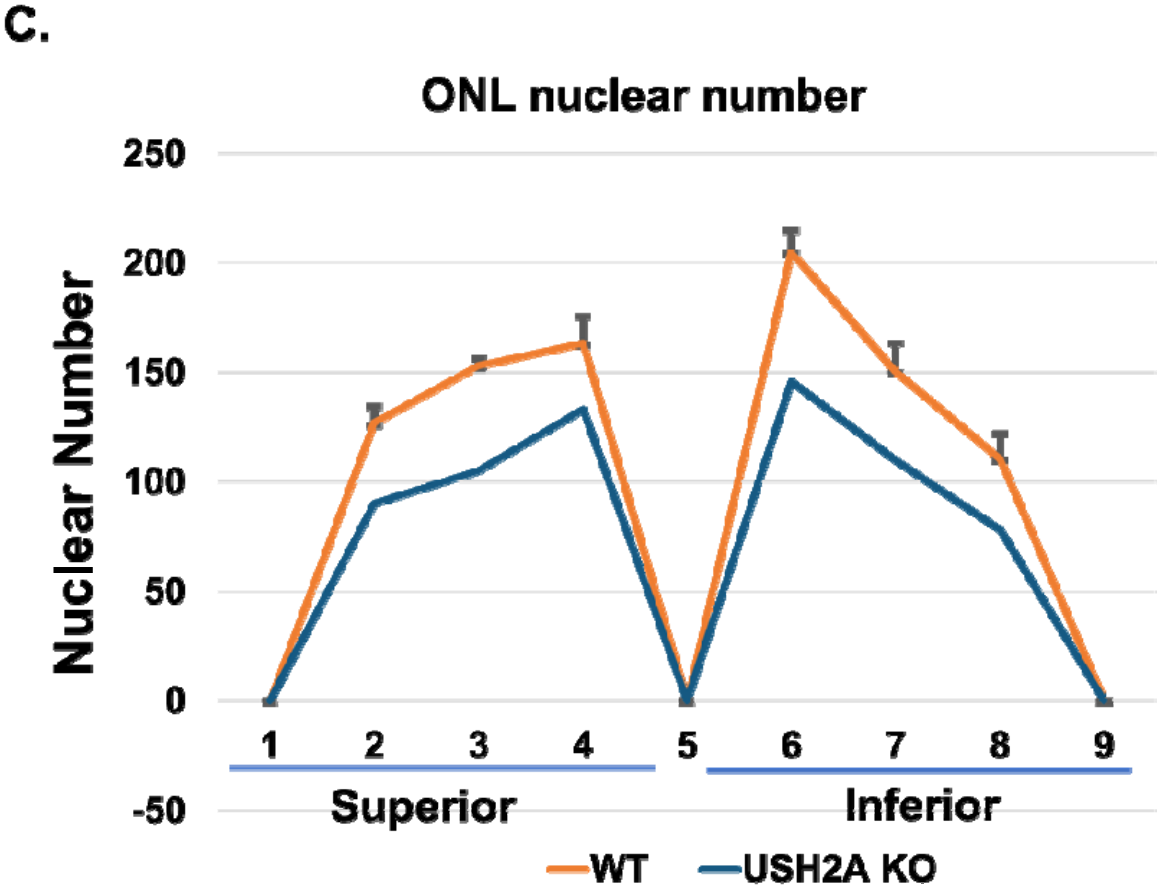

Figure 8. Hearing loss in USH2A KO rabbits

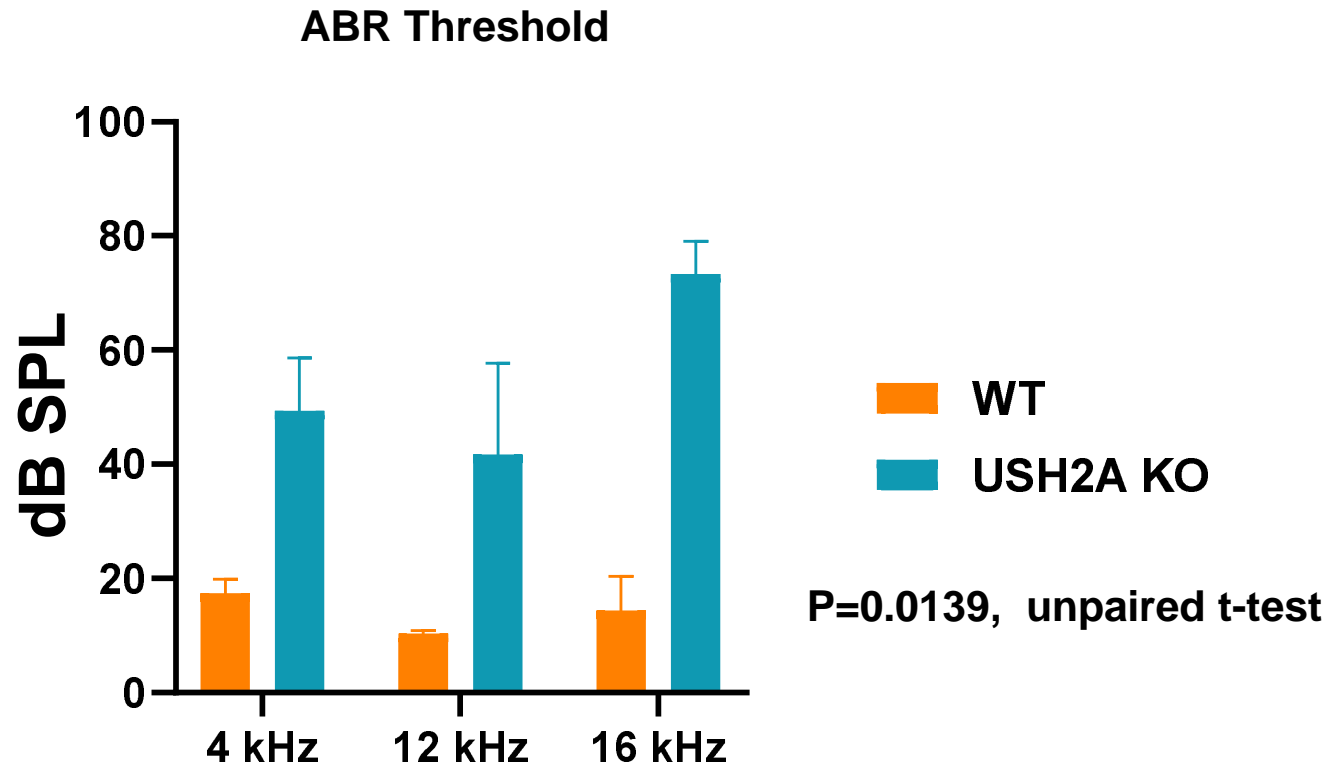

# Supplementary Figure 1. NGS sequencing of USH2A KO founder rabbits

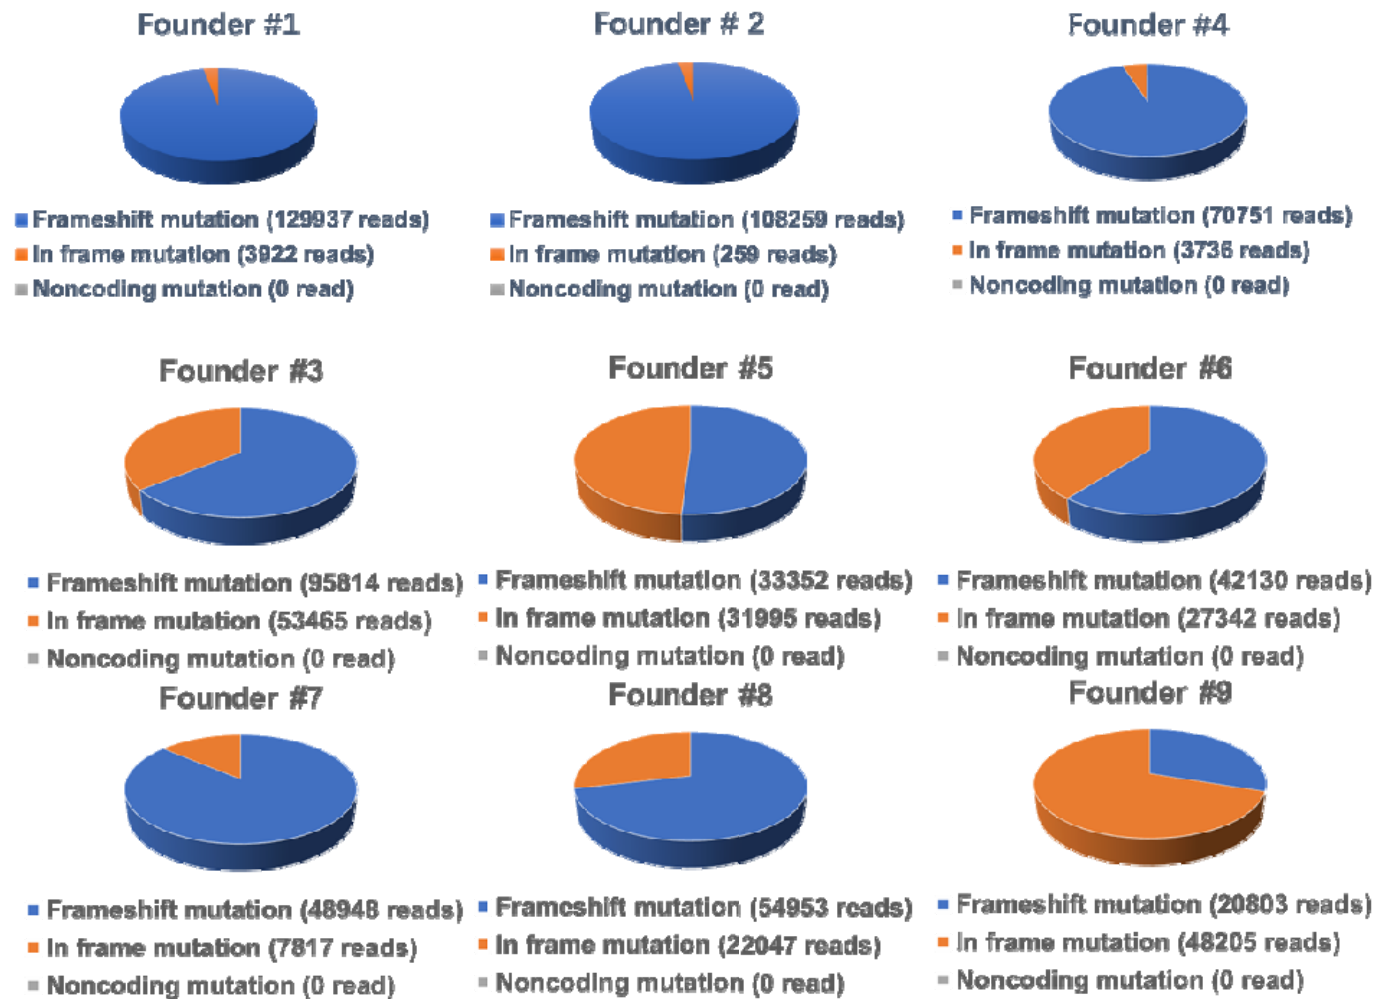

| Kits                  | #1   | #2    | #3   | #4 | #5   | #6   | #7   | #8   | #9   |
|-----------------------|------|-------|------|----|------|------|------|------|------|
| Frameshift allele (%) | 98.6 | 99.8  | 64.1 | 95 | 51.1 | 60.7 | 86.2 | 71.4 | 30.1 |
| Inframe allele (%)    | 1.4  | 0.2   | 35.9 | 5  | 48.9 | 39.3 | 13.8 | 28.6 | 69.9 |
| Ki allele (%)         | 0.01 | 15.08 | 0    | 0  | 0    | 0    | 0    | 0    | 0.08 |



**Supplementary Figure 2. Germline transmission of the mutant alleles in F1 generation rabbits (A) and Sanger sequencing of the OT1 off-target mutation (B).** Ot1: the off-target binding sequence. The 32 bp shadow part indicated the distance from the indels mutation (double peaks) site to the Cas9 cleavage site (3 bp upstream of the AGG PAM sequence)

**A**

- Wt GAAGC-----CAGAG-----GACTTCAGTGCACACCTGCAGAGAGAACTTTT
- (+14bp) GAAGC-----CAGAG**TAACCTTTGTTACT**GACTTCAGTGCACACCTGCAGAGAGAACTTTT (Kits #1,2,3,9)
- (+11bp) GAAGC**CCAGAGGACTT**CAGAG-----GACTTCAGTGCACACCTGCAGAGAGAACTTTT (kits # 4,5,6,7)
- (-26bp) GAAGC----- CAGAG-----AACTTTT (Kits #8)

**B**

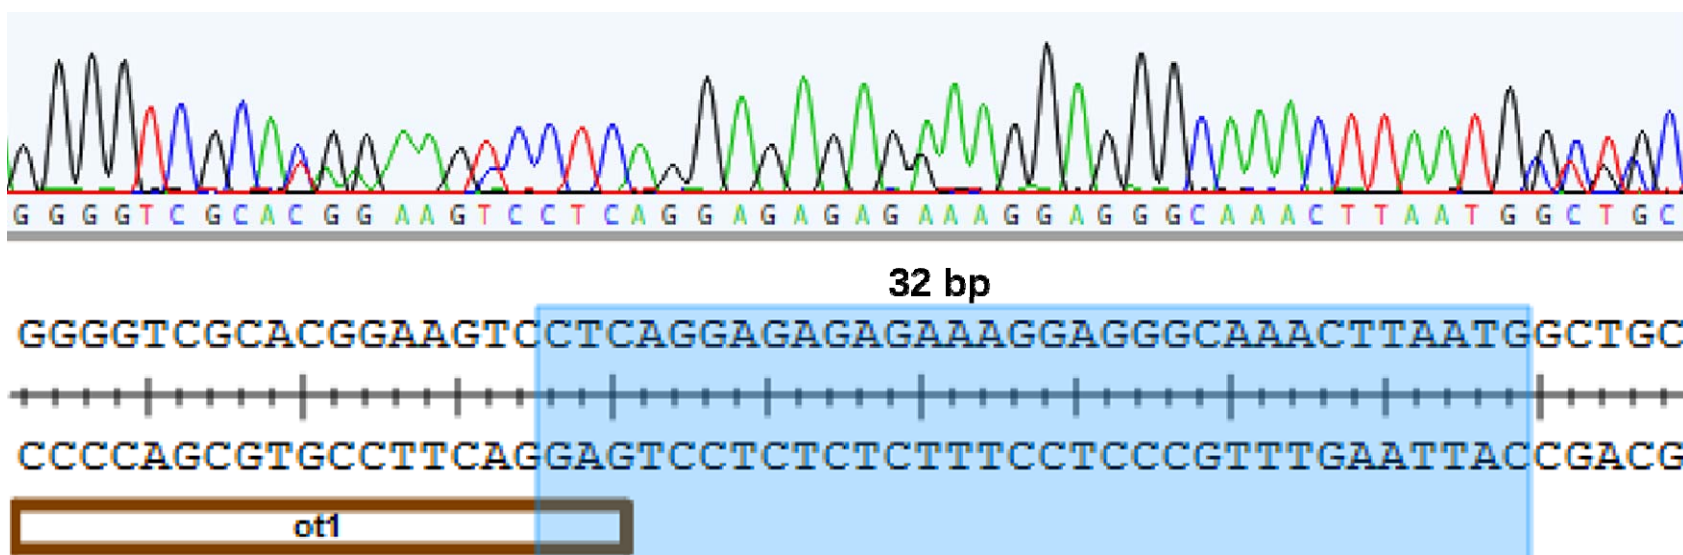

## Supplementary Figure 3. ERG Amplitudes in USH2A KO rabbits

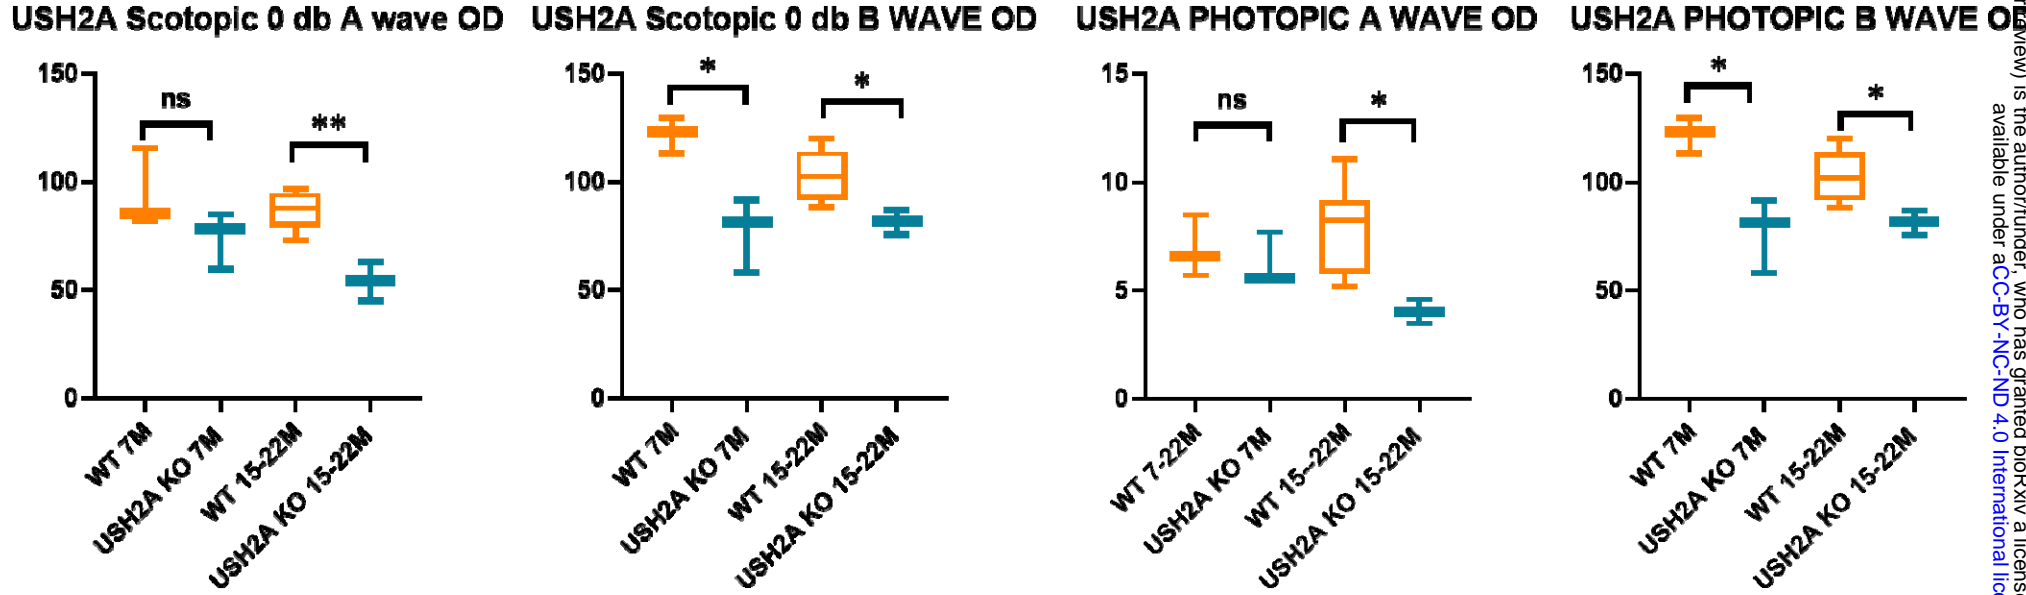

# Supplementary Figure 4. ERG implicit time in USH2A KO rabbits

USH2A 32Hz flicker implicit time

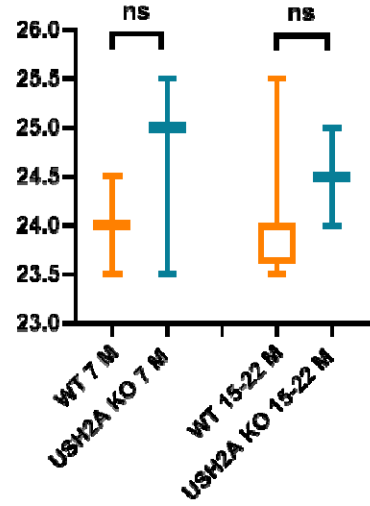

USH2A Scotopic ~24 dB flash implicit time OD

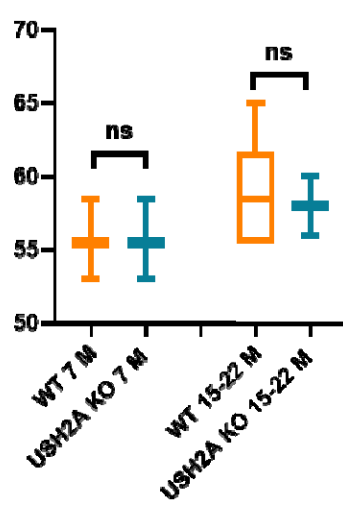

USH2A Scotopic 0 db A wave implicit time OD

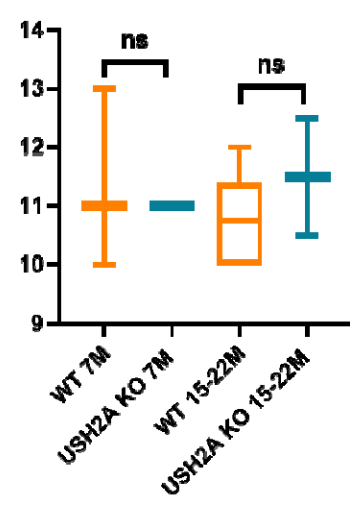

USH2A Scotopic 0 db B WAVE OD implicit time

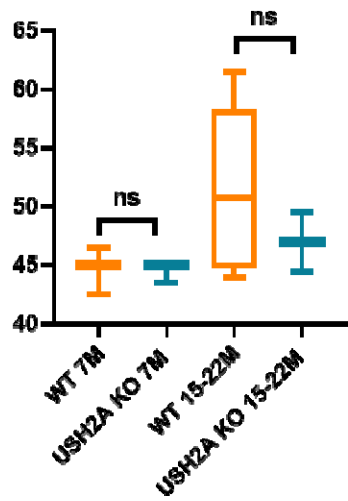

USH2A PHOTOPIC A WAVE OD implicit time

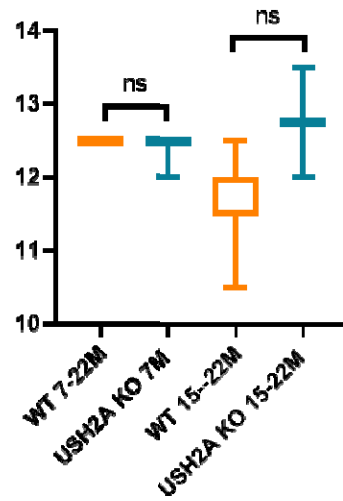

USH2A PHOTOPIC B WAVE OD implicit time

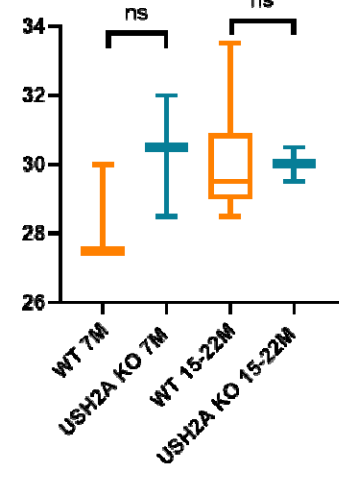



**Supplementary table 1**

|               | Target sequence                         |
|---------------|-----------------------------------------|
| <b>sgRNA1</b> | <b>GGTGTCGCACTGAAGTCCTC <u>TGG</u></b>  |
| <b>sgRNA2</b> | <b>CAGAGAGAACTTTTATGGTT <u>TGG</u></b>  |
| <b>sgRNA3</b> | <b>CACTCACACTGCCAGAAAG <u>AGG</u></b>   |
| <b>sgRNA4</b> | <b>GAGTGTA AAAAAGAAGCCAG <u>AGG</u></b> |

**Supplementary table 2**

| Primers     | Sequence                        |
|-------------|---------------------------------|
| <b>F1</b>   | <b>TCTGCAGTAGCATTGTTTGTGATT</b> |
| <b>R1</b>   | <b>GTCCCAGTCTCATCACAGTTACAA</b> |
| <b>F2</b>   | <b>ATTGCAATTTTGGATTTA</b>       |
| <b>R2</b>   | <b>ACGTTGGGTCTACAGAGGCACT</b>   |
| <b>dsF</b>  | <b>AGCCCTGCCAGTGTAACCTC</b>     |
| <b>dsR</b>  | <b>AGTGACTGAGCCTGCTGTGTTG</b>   |
| <b>RTF1</b> | <b>AATTCAGGCCAGTGCAAGTG</b>     |
| <b>RTR1</b> | <b>GCCAGAAAGAGGATTGCAG</b>      |
| <b>RTF2</b> | <b>GGAGAAGAAGAGGGTGTGCT</b>     |
| <b>RTR2</b> | <b>GACTCTCCACTGGAAGCTGA</b>     |
